# Mapping Genes for NIDDM

## Design of the Finland–United States Investigation of NIDDM Genetics (FUSION) Study

TIMO VALLE, MD  
 JAAKKO TUOMILEHTO, MD, PHD  
 RICHARD N. BERGMAN, PHD  
 SOUMITRA GHOSH, MD, PHD  
 ELIZABETH R. HAUSER, PHD  
 JOHAN ERIKSSON, MD, PHD  
 STELLA J. NYLUND, PHD  
 KIMMO KOHTAMÄKI, MS  
 LIISA TOIVANEN, RN  
 GABRIELE VIDGREN, MS  
 EVA TUOMILEHTO-WOLF, MD

CHRISTIAN EHNHOLM, MD, PHD  
 JILLIAN BLASCHAK  
 CARL D. LANGEFELD, MS  
 RICHARD M. WATANABE, PHD  
 VICTORIA MAGNUSON, PHD  
 DELPHINE S. ALLY, MS  
 WILLIAM A. HAGOPIAN, MD, PHD  
 EDNA ROSS  
 THOMAS A. BUCHANAN, MD  
 FRANCIS COLLINS, MD, PHD  
 MICHAEL BOEHNKE, PHD

**OBJECTIVE** — To map and identify susceptibility genes for NIDDM and for the intermediate quantitative traits associated with NIDDM.

**RESEARCH DESIGN AND METHODS** — We describe the methodology and sample of the Finland–United States Investigation of NIDDM Genetics (FUSION) study. The whole genome search approach is being applied in studies of several different ethnic groups to locate susceptibility genes for NIDDM. Detailed description of the study materials and designs of such studies are important, particularly when comparing the findings in these studies and when combining different data sets.

**RESULTS** — Using a careful selection strategy, we have ascertained 495 families with confirmed NIDDM in at least two siblings and no history of IDDM among the first-degree relatives. These families were chosen from more than 22,000 NIDDM patients, representative of patients with NIDDM in the Finnish population. In a subset of families, a spouse and offspring were sampled, and they participated in a frequently sampled intravenous glucose tolerance test (FSIGT) analyzed with the Minimal Model. An FSIGT was completed successfully for at least two nondiabetic offspring in 156 families with a confirmed nondiabetic spouse and no history of IDDM in first-degree relatives.

**CONCLUSIONS** — Our work demonstrates the feasibility of collecting a large number of affected sib-pair families with NIDDM to provide data that will enable a whole genome search approach, including linkage analysis.

From the Genetic Epidemiology and Diabetes Unit, Department of Epidemiology and Health Promotion (T.V., J.T., J.E., S.J.N., K.K., E.T.-W., L.T., G.V.), and the Department of Biochemistry (C.E.), National Public Health Institute, Helsinki, Finland; the Department of Physiology and Biophysics (R.N.B., R.M.W., E.R.), School of Medicine, and the Department of Medicine (T.A.B.), Division of Endocrinology, University of Southern California, Los Angeles, California; the National Human Genome Research Institute (S.G., S.J.N., V.M., D.S.A., F.C.), National Institutes of Health, Bethesda, Maryland; the Department of Biostatistics (E.R.H., J.B., C.D.L., R.M.W., M.B.), School of Public Health, University of Michigan, Ann Arbor, Michigan; and the Department of Medicine (W.A.H.), University of Washington, Seattle, Washington.

Address correspondence and reprint requests to Dr. Timo Valle, National Public Health Institute, Department of Epidemiology and Health Promotion, Genetic Epidemiology and Diabetes Unit, Mannerheimintie 166, SF-00300 Helsinki, Finland. E-mail: timo.valle@ktl.fi.

Received for publication 30 April 1997 and accepted in revised form 26 February 1998.

**Abbreviations:** ASP, affected sib pair; CV, coefficient of variation; FSIGT, frequently sampled intravenous glucose tolerance test; FUSION, Finland–United States Investigation of NIDDM Genetics; IBD, identical by descent; LOD, logarithm of odds; NHDR, National Hospital Discharge Registry; OGTT, oral glucose tolerance test; OHA, oral hypoglycemic agent; QC, quality control; RIA, radioimmunoassay; WHO, World Health Organization.

NIDDM is a multifactorial disease that is increasingly common in adults in most populations (1). The familial character of NIDDM has long been suspected and was properly documented by several studies early in the 20th century (2–5). In the past 2 decades, twin studies and family studies have provided strong evidence for a genetic component in NIDDM. Concordance rate estimates for monozygotic twins range from 34 to 100% and are approximately two times higher than those for dizygotic twins (6–9). Family studies suggest a three- to fourfold increased risk to first-degree relatives of individuals with NIDDM compared with the general population (10).

Because of the likely etiologic heterogeneity of NIDDM, it may be useful to study intermediate quantitative traits that predispose individuals to diabetes in order to identify the diabetes genes (11). Familial aggregation of insulin resistance has been shown in several studies (12–16), and aggregation has recently been demonstrated for acute insulin secretory response (17). Although it remains uncertain whether the primary defect leading to NIDDM is peripheral insulin resistance or a relative decrease in insulin secretion, most NIDDM patients have both defects. Thus, efforts to map these and other NIDDM-related quantitative traits have the potential to increase our understanding of the genetics of NIDDM.

Until recently, the search for genes for NIDDM has focused on population association and linkage studies using the candidate-gene approach. Although association or linkage has been reported for some candidate genes, the results from these studies have not elucidated diabetes genes and instead indicate that a systematic search of the entire genome is warranted. Performing a genome search now is propitious because increasingly dense and more complete genetic maps have become available, methods of genotyping have become more efficient, and linkage analysis techniques suited to the study of complex diseases continue to be developed (11).

To map the genes for NIDDM and NIDDM-associated traits such as acute

insulin response and insulin resistance, we have chosen the Finnish population as the target for our study. In this paper, we describe the rationale, design, and sample characteristics of the Finland–United States Investigation of NIDDM Genetics (FUSION) study.

## RESEARCH DESIGN AND METHODS

### Family ascertainment criteria

Relatives of individuals who were diagnosed with NIDDM at an early age have a higher disease risk than relatives of individuals with a later onset of disease (18). However, there is a relatively greater risk of IDDM among the younger age-groups. Therefore, to maximize the genetic component while minimizing the likelihood of identifying subjects with IDDM, we ascertained probands in whom diabetes was diagnosed between 35 and 60 years of age. A given family was eligible for participation in the FUSION study if 1) the proband or another affected sibling was diagnosed with NIDDM between 35 and 60 years of age, 2) there was no history of IDDM in first-degree relatives, 3) the proband had one or more full siblings diagnosed with NIDDM at any age, and 4) at least one parent was apparently nondiabetic, with preference given to families with living parents or parents who had lived a long life without known diabetes. The last criterion was included to minimize bilineality. In this paper, we use the term index case to indicate the first proband or affected sibling in each family who met our study inclusion criteria.

### Sources and types of families

There are approximately 150,000 known NIDDM patients in Finland. The probands in the FUSION study were identified primarily from the National Hospital Discharge Registry (NHDR), which includes records since 1970 of all hospitalized patients with diabetes, and from previous studies carried out by the National Public Health Institute in Finland. From the NHDR, we identified all patients who were hospitalized with a diagnosis of NIDDM in Finland during 1987–1993.

A total of 33,029 potential probands were initially identified in 1994, 29,807 of them from the NHDR. A total of 22,312 screening questionnaires were sent to the NIDDM patients living relatively close to one of the 21 clinics we established for this study. The patients were also sent a short

description of study eligibility criteria, including our minimum requirement of a diabetic sib pair. A total of 9,626 individuals returned the screening questionnaire. In addition, 14 eligible families voluntarily contacted us and were included in the study.

Families in the FUSION study were classified as nuclear or extended. In the nuclear families, all the affected siblings and any living parents were studied. At least one affected sib pair (ASP) was required in each family. In the extended families, in addition to the nuclear family members, we studied a nondiabetic spouse and at least two offspring of an affected sibling, fulfilling the proband criteria described above.

### Control subjects

The primary purpose of the control subjects in the FUSION study was to provide allele frequency estimates in unaffected individuals for comparison with affected individuals. All our control subjects were born in the year 1925 and had been examined with oral glucose tolerance tests (OGTTs) in 1990 as part of the South Finland Aging Study (19). Those who had normoglycemic OGTT values by the World Health Organization's (WHO) criteria were given a second OGTT as part of the FUSION study in 1995, and the 248 individuals with normal glucose tolerance according to both OGTTs were included as control subjects for the FUSION study.

### Diabetes status

The diagnosis of diabetes was accepted if an individual was receiving drug treatment for diabetes or if the blood glucose values obtained from the medical records met current WHO criteria (20). Fasting blood glucose was determined in all individuals at the FUSION examination. If patients were treated with diet alone and fasting blood glucose was  $<7.0$  mmol/l, the diagnosis of diabetes was confirmed by OGTT. The age at diagnosis of NIDDM was based on self-reported information. The inferred diabetes status of parents was based primarily on information reported by the affected siblings because nearly all their parents were deceased.

Cases of probable IDDM were identified to exclude them from future analyses. An individual was classified as having probable adult-onset IDDM if 1) insulin treatment was started within 10 years of disease diagnosis, autoantibodies to GAD were detected, and the fasting C-peptide

was  $\leq 0.30$  nmol/l; or if 2) insulin treatment was started within 4 years of diagnosis and the fasting C-peptide was  $\leq 0.30$  nmol/l. Medical record review was carried out for all affected individuals whose C-peptide was  $<0.50$  nmol/l, who had antibodies to GAD, or who were treated with insulin and for whom C-peptide and/or GAD antibody samples were not assayed in the FUSION study to confirm their age of diagnosis and the age when insulin treatment was started.

### Study clinics and examinations

The FUSION study was carried out in 21 cities distributed throughout much of Finland. The study nurses from each clinic attended a 1-week training seminar in Helsinki. Blood collection and all clinical measurements were carefully standardized.

All study subjects underwent a screening examination during a single visit. In addition, nondiabetic spouses and offspring returned for a frequently sampled intravenous glucose tolerance test (FSIGT) during a second visit. At the screening examination, blood pressure, pulse, weight, height, and waist and hip circumferences were measured on all participating family members and control subjects. Also, data on medical and lifestyle history, medication, current health status, physical activity, diet, smoking history, alcohol consumption, gestational medical history, and birth weight were collected from all family members and control subjects.

Blood samples for DNA, fasting glucose and insulin, and serum lipids were drawn for all participating family members. In addition, OGTTs were carried out in nondiabetic family members. OGTTs were performed according to WHO criteria (75-g oral load of glucose). Serum C-peptide and autoantibodies to GAD were assayed in the affected family members. An overnight urine sample was collected from each diabetic family member to assess urinary albumin-to-creatinine ratio.

Tolbutamide-modified FSIGTs were performed in nondiabetic spouses and nondiabetic offspring during a second visit in six clinics. The reduced sampling protocol, in which 14 blood samples for glucose and insulin were collected over the course of a 3-h test (21), was employed. FSIGT data were analyzed, using the Minimal Model method (22), to derive quantitative measures of insulin sensitivity ( $S_I$ ) and glucose effectiveness ( $S_G$ ). Insulin secretion was assessed as the acute insulin response

to glucose ( $AIR_G$ ) calculated as described by Ward et al. (23).

### Assays

Blood glucose concentration was initially measured at the study clinic using a glucose monitoring device (One Touch; LifeScan, Milpitas, CA). Plasma glucose, plasma insulin, and serum C-peptide samples were frozen and shipped on dry ice to the central laboratory at the University of Southern California in Los Angeles, California, for measurement. Plasma glucose was measured on an autoanalyzer (YSI-2700; YSI, Yellow Springs, OH) using the glucose oxidase method. Interassay coefficients of variation (CVs) were 2.9 and 2.3% for the low and high quality control (QC) pools, respectively. The correlation between One Touch and plasma glucose values was 0.94 and 0.96 for fasting glucose and postload glucose values, respectively. Plasma insulin was measured by radioimmunoassay (RIA) using dextran-charcoal separation (24). Antibody and tracer for the insulin RIA were purchased from Novo Nordisk (Bagsvaerd, Denmark). Interassay CVs were 11 and 13% for low and high QC pools, respectively. Serum C-peptide was determined by using a kit purchased from Linco (St. Charles, MO) with interassay CVs of 14 and 5% for low and high QC pools, respectively.

Autoantibodies to GAD were measured at the University of Washington in Seattle, Washington, by fluid-phase immunoprecipitation assay (25) using recombinant human GAD65 radiolabeled by in vitro translation (TNT; Promega, Madison, WI) in the presence of [ $^{35}$ S]methionine (Amersham, Arlington Heights, IL) (26). The assay had high sensitivity and 100% specificity in an international GAD antibody workshop (27) and an interassay CV of 15%.

Serum total and HDL cholesterol and triglycerides were determined in Helsinki from fresh samples using an enzymatic assay method (CHOD-PAP; Monotest; Boehringer Mannheim, Indianapolis, IN). The interassay CVs for total cholesterol, HDL cholesterol, and triglycerides were 1.2, 2.2, and 1.6%, respectively. Urine creatinine and albumin concentrations were also measured at the National Public Health Institute in Helsinki. The creatinine in urine was determined using the method of Jaffe (28), and the urinary albumin concentration was determined by the immunoturbidometric method, using reagents from Roche (Montclair, NJ) (29). Interassay CVs for urine creatinine and albumin were 2.4 and 5.1%, respectively.

DNA was isolated from 30 ml of fresh whole blood in EDTA using the Purgene D-50K DNA isolation kit (Gentra Systems, Plymouth, MN) at the National Public Health Institute. The isolated samples were frozen and shipped on dry ice to the National Human Genome Research Institute in Bethesda, Maryland.

### Genotyping

The genetic markers being used for genetic mapping in the FUSION study are modified ABI sets (Applied Biosystems Division of Perkin-Elmer, Foster City, CA) consisting of approximately 365 dinucleotide repeats divided into 28 panels, each of which contains 7 to 19 markers generating a 10-centimorgan (cM) average density map. Incorrect genotypes can give rise to inflated map lengths and reduced power to detect linkage. Thus, a genotyping system that has a low frequency of errors is a particularly important tool in the study of complex diseases, in which gene effects may often be weak. Because the commercially based software available from ABI is not very efficient at automatically adjusting for gel-to-gel variation in allele sizing, or for allele calling ("binning"), we developed software to do these tasks automatically. In addition, we optimized our genotyping system for precise sizing and binning of alleles (30). The automation also allows us to run a series of internal checks to improve the binning accuracy and reproducibility. The blinded presence of samples in duplicate allowed us to estimate a genotype-specific error rate of 0.034% (2 of 5,846) for the last 64 markers typed in our laboratory.

Because of previous findings suggesting an association between HLA haplotypes and NIDDM, *HLA-A*, *C*, *B*, *Bw*, *DR* and *DQ* genotypes were also determined serologically using 180 HLA antisera (120 class I and 60 class II) (31) in 110 extended families in Helsinki.

### Statistical analysis plan

The variety of phenotypic data, together with the uncertain etiology of NIDDM and its associated quantitative traits, requires a multifaceted statistical analysis strategy. In the initial phase of genome screening for NIDDM, we will depend primarily on mode-of-inheritance-free methods of linkage analysis that compare estimated allele sharing identical by descent (IBD) in the ASPs to expectations under the hypothesis that no disease locus is present (32–34). By parameterizing our models in terms of

probability of IBD sharing in the ASPs, we will be able both to search for linkage and to build exclusion maps of regions that appear unlikely to harbor NIDDM genes of specified levels of genetic effect. Similar approaches can be taken for the NIDDM-associated quantitative traits using a regression or variance components framework (35,36).

In the initial genome scan, we will follow up even rather modest suggestions of linkage by typing additional markers in the region. Our simulations (32) suggest that following up logarithm of odds (LOD) scores even as low as 1.0 is not expected to result in more than about 10 false-positive findings in a genome scan of 300–400 markers and provides good power to detect loci of even modest effect. For regions identified as likely to harbor a disease gene, we also will employ mode-of-inheritance-based methods of linkage analysis as well as combined segregation and linkage analysis in hopes of more accurately assessing the existence and the effect of the putative disease loci. In addition, we will emphasize linkage disequilibrium mapping as a complementary strategy of disease gene localization, particularly once initial evidence for linkage is obtained.

## RESULTS

### Family ascertainment

Among the 9,626 respondents to the screening questionnaire, there were 1,835 potential probands with onset of diabetes between 35 and 60 years of age who had at least one affected sibling and not both parents known to be diabetic. These potential probands were ranked according to their family information, with preference given to families with evidence of at least one nondiabetic parent and multiple early-onset affected siblings. A total of 1,382 potential probands living near one of the 21 FUSION study clinics were contacted by phone to confirm their eligibility and willingness to participate. Of these, 470 potential probands or their affected siblings were unable or unwilling to participate. An additional 286 diabetic patients were found to be ineligible during the first interview. Thus, from the list of potential probands and volunteers who contacted us, we enrolled 640 affected individuals from 577 separate families in the FUSION study. In addition, three families were enrolled in the study after the index case refused to participate.

Table 1—Diabetes affection status in all individuals

|            | Individuals studied | Confirmed NIDDM | Probable adult-onset IDDM | Nonaffected |
|------------|---------------------|-----------------|---------------------------|-------------|
| Index case | 577                 | 550             | 20                        | 7           |
| Sibling    | 733                 | 638             | 22                        | 73          |
| Father     | 10                  | 4               | 0                         | 6           |
| Mother     | 32                  | 16              | 1                         | 15          |
| Spouse     | 221                 | 16              | 0                         | 205         |
| Offspring  | 555                 | 16              | 0                         | 539         |
| Control    | 248                 | 0               | 0                         | 248         |
| Total      | 2,376               | 1,240           | 43                        | 1,093       |

Data are n.

### Characteristics of the study subjects

All index cases, siblings, and control subjects were born in Finland. Of the 577 studied index cases, diabetes status could not be confirmed in 7 individuals by fasting plasma glucose, OGTT, or review of the medical records. In addition, 20 index cases were classified as having probable adult-onset IDDM, leaving 550 index cases meeting FUSION study criteria for NIDDM (Table 1). A total of 733 siblings of the index cases with self-reported history of NIDDM were studied, and 638 of these siblings met FUSION study criteria for NIDDM. A total of 2,376 individuals were examined in the FUSION study (Table 1).

In the FUSION study, we have investigated a total of 580 Finnish families, ranging in size from 1 to 13 members. Of this total, 533 families have at least two siblings affected with diabetes, resulting in a total of 795 ASPs (Table 2). In 495 of these 533 families, no cases of probable adult-onset IDDM were identified among the individuals examined in the FUSION study or

among the first-degree relatives of the index cases or affected siblings, resulting in a total of 740 ASPs.

Offspring were studied in 210 extended families, and FSIGTs were carried out in 79% of these families. Altogether, 602 FSIGTs were successfully done for nonaffected family members in families with no IDDM cases. An FSIGT was completed for at least two nondiabetic offspring in 156 families with a nondiabetic spouse confirmed by OGTT (Table 2).

Of the affected index cases and affected siblings, 55 and 45% were men, respectively. The mean age of onset of diabetes was 49 years (range, 25–69) in male index cases and 51 years (30–72) in female index cases. The age of onset for affected siblings was 53 (29–74) and 54 (22–80) years in men and women, respectively (Table 3).

Of the index cases and siblings with NIDDM, 12% were treated with diet alone, 46% with oral hypoglycemic agents (OHAs), 21% with insulin alone, and 20% with a combination of insulin and OHAs.

The distribution of treatment modes corresponds well with that seen in Finnish diabetes clinics in general (37).

There were no notable differences in the means of the weight-related variables between affected index cases and siblings within either sex (Table 3). Of the male index cases and siblings, 40% were clearly overweight (BMI >30 kg/m<sup>2</sup>); 51% of the female index cases and 44% of the female siblings with NIDDM were overweight. The control subjects were leaner: only 18% of men and 24% of women were clearly overweight.

Of the index cases and their affected siblings, 7% had a fasting C-peptide value of ≤0.30 nmol/l. Of these diabetic subjects, 42% were classified as having probable adult-onset IDDM. Antibodies to GAD were detected in 3.2% of the affected index cases and in 4.1% of the affected siblings. After excluding the subjects classified as having probable IDDM, 10 (1.9%) of the 517 affected index cases and 13 (2.2%) of the 594 affected siblings showed GAD antibody positivity. In normoglycemic control subjects, GAD autoantibodies were detected in 2 (1.7%) of the 120 studied individuals. The mean fasting C-peptide values between 1.5 and 1.7 nmol/l for affected index cases and siblings (Table 4), respectively, are typical for individuals with NIDDM.

There were no notable differences between index cases and siblings in serum lipid and blood pressure values (Table 5). HDL cholesterol levels were considerably higher, and triglyceride levels were lower, in control subjects than in affected individuals. Based on the questionnaire data, 60% of the male index cases and 51% of male

Table 2—Distribution of the family sizes in the FUSION study

|                                                 | Studied family members (n) |    |     |    |    |    |    |    |    |    |     | Total number of families | Families with ≥2 siblings |  |
|-------------------------------------------------|----------------------------|----|-----|----|----|----|----|----|----|----|-----|--------------------------|---------------------------|--|
|                                                 | 0                          | 1  | 2   | 3  | 4  | 5  | 6  | 7  | 8  | 9  | 10+ |                          |                           |  |
| All family members                              |                            |    |     |    |    |    |    |    |    |    |     |                          |                           |  |
| Number of families                              | —                          | 15 | 261 | 81 | 26 | 75 | 58 | 30 | 14 | 11 | 9   | 580*                     |                           |  |
| Affected siblings                               |                            |    |     |    |    |    |    |    |    |    |     |                          |                           |  |
| Number of families                              | —                          | 39 | 431 | 92 | 7  | 1  | 1  | 1  | —  | —  | —   | 572                      | 533                       |  |
| After excluding families with IDDM              | —                          | 37 | 400 | 86 | 6  | 1  | 1  | 1  | —  | —  | —   | 532                      | 495                       |  |
| Offspring in extended families                  |                            |    |     |    |    |    |    |    |    |    |     |                          |                           |  |
| Number of families                              | —                          | 14 | 108 | 50 | 23 | 8  | 6  | 1  | —  | —  | —   | 210                      |                           |  |
| Offspring with sampled FSIGT†                   |                            |    |     |    |    |    |    |    |    |    |     |                          |                           |  |
| Number of families in which spouse also sampled | 4                          | 18 | 78  | 31 | 15 | 7  | 3  | 0  | —  | —  | —   | 156                      |                           |  |
| Spouse not sampled                              | —                          | 5  | 14  | 4  | 2  | 0  | 1  | 1  | —  | —  | —   | 27                       |                           |  |

Data are n. Control subjects were not included in these data. \*Three index cases refused to participate after the family was enrolled; additional affected siblings met study criteria for proband in these families. †In families with no IDDM cases.

Table 3—Age- and weight-related data in the subjects in families with no IDDM cases

|                       | Subjects (n) | Age at clinical examination (years) | Age at diabetes diagnosis (years) | Duration of diabetes (years) | BMI (kg/m <sup>2</sup> ) | Waist-to-hip ratio |
|-----------------------|--------------|-------------------------------------|-----------------------------------|------------------------------|--------------------------|--------------------|
| <b>Men</b>            |              |                                     |                                   |                              |                          |                    |
| Affected index cases  | 290          | 62.2 ± 7.1 (62.7)                   | 49.4 ± 8.1 (50.0)                 | 12.9 ± 7.0 (11.8)            | 29.3 ± 4.4 (28.8)        | 0.98 ± 0.06 (0.97) |
| Affected siblings     | 276          | 63.6 ± 8.7 (64.4)                   | 53.3 ± 9.4 (53.0)                 | 10.4 ± 7.2 (9.1)             | 29.3 ± 4.1 (29.1)        | 0.98 ± 0.06 (0.98) |
| Affected fathers      | 3            | 77.7 ± 6.0 (77.9)                   | 55.5 ± 3.5 (55.5)                 | 19.3 ± 0.9 (19.3)            | 24.8 ± 1.8 (24.0)        | 0.97 ± 0.01 (0.98) |
| Nonaffected fathers   | 4            | 77.8 ± 11.0 (76.9)                  | —                                 | —                            | 27.1 ± 3.5 (27.6)        | 0.96 ± 0.06 (0.97) |
| Nonaffected spouses   | 63           | 65.8 ± 8.2 (66.7)                   | —                                 | —                            | 27.6 ± 3.5 (27.9)        | 0.94 ± 0.06 (0.94) |
| Nonaffected offspring | 260          | 35.0 ± 7.2 (35.7)                   | —                                 | —                            | 26.5 ± 4.0 (26.0)        | 0.92 ± 0.07 (0.92) |
| Control subjects      | 119          | 70.0 ± 0.3 (70.0)                   | —                                 | —                            | 27.0 ± 4.1 (26.6)        | 0.94 ± 0.06 (0.94) |
| <b>Women</b>          |              |                                     |                                   |                              |                          |                    |
| Affected index cases  | 240          | 65.3 ± 7.6 (65.7)                   | 50.8 ± 7.6 (50.5)                 | 14.5 ± 7.0 (14.3)            | 30.8 ± 5.1 (30.0)        | 0.90 ± 0.07 (0.90) |
| Affected siblings     | 337          | 66.2 ± 8.6 (66.9)                   | 54.3 ± 9.8 (55.0)                 | 11.7 ± 8.1 (10.6)            | 30.0 ± 5.2 (29.5)        | 0.89 ± 0.07 (0.89) |
| Affected mothers      | 16           | 79.6 ± 5.7 (80.9)                   | 67.9 ± 11.6 (67.0)                | 12.8 ± 9.4 (14.6)            | 27.0 ± 4.1 (26.8)        | 0.87 ± 0.05 (0.88) |
| Nonaffected mothers   | 10           | 79.5 ± 7.9 (79.5)                   | —                                 | —                            | 27.9 ± 3.1 (26.7)        | 0.91 ± 0.04 (0.92) |
| Nonaffected spouses   | 134          | 59.4 ± 6.7 (59.8)                   | —                                 | —                            | 28.9 ± 4.8 (28.2)        | 0.85 ± 0.07 (0.85) |
| Nonaffected offspring | 260          | 34.3 ± 7.4 (34.7)                   | —                                 | —                            | 25.4 ± 4.9 (24.5)        | 0.80 ± 0.06 (0.80) |
| Control subjects      | 129          | 70.2 ± 0.3 (70.2)                   | —                                 | —                            | 27.3 ± 4.1 (26.3)        | 0.82 ± 0.05 (0.81) |

Data are means ± SD (median).

affected siblings had hypertension; 25% of the male control subjects reported hypertension. In women, the contrast between affected individuals and control subjects was even greater: 65 and 60 vs. 24% for female index cases, affected siblings, and control subjects, respectively.

The Minimal Model–derived FSIGT values for nondiabetic spouses and offspring are shown in Table 6. Nondiabetic women were generally more insulin sensitive than nondiabetic men. In men, this finding was partly compensated for by a more robust acute insulin response. How-

ever, the mean disposition index remained higher in females than in males. Also, the nonaffected spouses were more insulin resistant than their offspring.

**CONCLUSIONS** — In a study of the determinants of a complex genetic disease

Table 4—Plasma glucose, plasma insulin, and serum C-peptide values in subjects in families with no IDDM cases

|                       | OGTT                            |                             |                                 |                             |                                  |
|-----------------------|---------------------------------|-----------------------------|---------------------------------|-----------------------------|----------------------------------|
|                       | Fasting plasma glucose (mmol/l) | 2-h plasma glucose (mmol/l) | Fasting plasma insulin (pmol/l) | 2-h plasma insulin (pmol/l) | Fasting serum C-peptide (nmol/l) |
| <b>Men</b>            |                                 |                             |                                 |                             |                                  |
| Affected index cases  | 10.7 ± 3.5 (10.1)               | —                           | 104 ± 70 (90)                   | —                           | 1.5 ± 1.0 (1.3)                  |
| Affected siblings     | 10.4 ± 3.4 (9.6)                | —                           | 108 ± 65 (96)                   | —                           | 1.7 ± 0.9 (1.5)                  |
| Affected fathers      | 10.7 ± 6.0 (7.6)                | —                           | 60 ± 16 (54)                    | —                           | —                                |
| Nonaffected fathers   | 5.0 ± 1.8 (5.6)                 | 5.8 ± 1.7 (6.0)             | 98 ± 73 (84)                    | 508 ± 572 (282)             | —                                |
| Nonaffected spouses   | 5.5 ± 0.9 (5.4)                 | 6.3 ± 1.8 (6.0)             | 85 ± 71 (66)                    | 462 ± 408 (336)             | —                                |
| Nonaffected offspring | 5.2 ± 0.6 (5.1)                 | 5.2 ± 1.5 (4.9)             | 72 ± 39 (66)                    | 300 ± 246 (207)             | —                                |
| Control subjects      | 5.1 ± 0.5 (5.1)                 | 5.6 ± 1.2 (5.5)             | 66 ± 37 (60)                    | 365 ± 218 (348)             | —                                |
| <b>Women</b>          |                                 |                             |                                 |                             |                                  |
| Affected index cases  | 10.7 ± 3.3 (10.4)               | —                           | 126 ± 72 (114)                  | —                           | 1.6 ± 0.9 (1.4)                  |
| Affected siblings     | 10.0 ± 3.4 (9.5)                | —                           | 116 ± 63 (102)                  | —                           | 1.6 ± 0.9 (1.5)                  |
| Affected mothers      | 8.0 ± 2.5 (7.4)                 | —                           | 104 ± 58 (90)                   | —                           | —                                |
| Nonaffected mothers   | 5.8 ± 0.8 (5.7)                 | 7.6 ± 2.1 (7.8)             | 92 ± 30 (84)                    | 408 ± 193 (432)             | —                                |
| Nonaffected spouses   | 5.2 ± 0.6 (5.1)                 | 6.1 ± 1.7 (6.0)             | 71 ± 33 (66)                    | 405 ± 259 (357)             | —                                |
| Nonaffected offspring | 4.9 ± 0.5 (4.8)                 | 5.5 ± 1.4 (5.4)             | 62 ± 30 (54)                    | 335 ± 244 (243)             | —                                |
| Control subjects      | 4.9 ± 0.4 (4.9)                 | 5.7 ± 1.2 (5.6)             | 67 ± 32 (60)                    | 410 ± 238 (378)             | —                                |

Data are means ± SD (median).

Table 5—Serum lipid and blood pressure values in studied subjects in families with no IDDM cases

|                       | Serum total cholesterol (mmol/l) | Serum HDL cholesterol (mmol/l) | Serum triglycerides (mmol/l) | Systolic blood pressure (mmHg) | Diastolic blood pressure (mmHg) |
|-----------------------|----------------------------------|--------------------------------|------------------------------|--------------------------------|---------------------------------|
| <b>Men</b>            |                                  |                                |                              |                                |                                 |
| Affected index cases  | 5.7 ± 1.3 (5.5)                  | 1.03 ± 0.29 (1.00)             | 2.6 ± 2.3 (2.0)              | 152 ± 21 (150)                 | 87 ± 11 (88)                    |
| Affected siblings     | 5.6 ± 1.3 (5.6)                  | 1.02 ± 0.27 (1.00)             | 2.5 ± 2.6 (1.9)              | 150 ± 22 (148)                 | 85 ± 12 (84)                    |
| Affected fathers      | 4.6 ± 1.7 (5.6)                  | 1.12 ± 0.36 (1.11)             | 1.1 ± 0.6 (1.2)              | 151 ± 8 (152)                  | 84 ± 5 (82)                     |
| Nonaffected fathers   | 5.5 ± 0.7 (5.7)                  | 1.06 ± 0.14 (1.11)             | 1.4 ± 0.2 (1.5)              | 145 ± 30 (146)                 | 83 ± 17 (85)                    |
| Nonaffected spouses   | 5.5 ± 0.8 (5.5)                  | 1.12 ± 0.30 (1.07)             | 1.6 ± 0.9 (1.4)              | 150 ± 20 (148)                 | 85 ± 11 (84)                    |
| Nonaffected offspring | 5.3 ± 1.0 (5.2)                  | 1.19 ± 0.29 (1.16)             | 1.6 ± 1.0 (1.2)              | 130 ± 13 (130)                 | 82 ± 10 (80)                    |
| Controls subjects     | 5.7 ± 0.9 (5.6)                  | 1.28 ± 0.29 (1.26)             | 1.5 ± 0.7 (1.4)              | 149 ± 18 (150)                 | 88 ± 9 (88)                     |
| <b>Women</b>          |                                  |                                |                              |                                |                                 |
| Affected index cases  | 5.9 ± 1.3 (5.8)                  | 1.15 ± 0.32 (1.08)             | 2.5 ± 1.7 (2.1)              | 156 ± 24 (154)                 | 83 ± 11 (82)                    |
| Affected siblings     | 5.9 ± 1.1 (5.8)                  | 1.16 ± 0.30 (1.12)             | 2.3 ± 1.6 (1.8)              | 157 ± 25 (154)                 | 84 ± 11 (84)                    |
| Affected mothers      | 5.7 ± 1.1 (5.9)                  | 1.17 ± 0.25 (1.14)             | 2.4 ± 1.8 (1.8)              | 151 ± 20 (160)                 | 79 ± 16 (80)                    |
| Nonaffected mothers   | 6.0 ± 1.4 (6.3)                  | 1.38 ± 0.44 (1.36)             | 1.4 ± 0.4 (1.4)              | 143 ± 18 (134)                 | 80 ± 6 (80)                     |
| Nonaffected spouses   | 6.1 ± 1.1 (6.0)                  | 1.43 ± 0.35 (1.36)             | 1.4 ± 0.6 (1.2)              | 146 ± 22 (142)                 | 86 ± 11 (86)                    |
| Nonaffected offspring | 4.9 ± 0.9 (4.9)                  | 1.36 ± 0.30 (1.34)             | 1.1 ± 0.5 (0.9)              | 123 ± 14 (120)                 | 77 ± 10 (78)                    |
| Control subjects      | 6.4 ± 1.0 (6.4)                  | 1.54 ± 0.30 (1.55)             | 1.4 ± 0.6 (1.2)              | 147 ± 16 (148)                 | 86 ± 10 (86)                    |

Data are means ± SD (median).

such as NIDDM, careful attention should be paid to all elements of study design. These elements include selection of the study population, ascertainment and exclusion criteria for probands and families, and the choice of phenotypes and genetic markers for study. Currently, there are several ongoing efforts to map the susceptibility genes for NIDDM using the whole genome search approach (38–42) and many others using the candidate-gene approach. To permit valid comparison of results from different studies and to assess the meaning of consistency or inconsistency of these results, proper understanding of study design, study methods, and family samples is of critical importance. In this report, we have described the sampling design and study methods we are using, and the sample of families obtained, in the FUSION study.

#### Advantages and relevance of a genetic study of NIDDM in Finland

There are several advantages in using a Finnish population for carrying out genetic studies. The vast majority of Finland's 5.1 million inhabitants belong linguistically and ethnically to the Finno-Ugrian ethnic group with some admixture with the Swedish population in the coastal areas of the country. Finns are closely related to other populations of northern Europe (43), and it has been estimated that the bottleneck in the Finnish population dates back 4,000 years (44). During the first centuries after the end of migration in about A.D. 800, linguistic, geographic, and cultural barriers kept the Finns isolated from the surrounding areas (45). This small founding population and relative homogeneity increases the likelihood that individual genes predisposing to

NIDDM can be identified, as has been demonstrated for genes responsible for several monogenic hereditary diseases (46–48). Relative genetic homogeneity is likely to have resulted in fewer NIDDM genes segregating than in outbred populations such as those of the U.S. or the U.K., so that individual NIDDM-susceptibility genes should be easier to detect. This distinction is important, because the detection of genes for a complex disease generally requires large samples of families, and the power to detect linkage is inversely related to the magnitude of the effect of the gene on disease risk.

NIDDM in Finland is clinically similar to NIDDM in other European populations, and the prevalence of NIDDM in Finland is similar to that of most other European populations (49). Thus, it is reasonable to expect that NIDDM susceptibility genes identified

Table 6—FSIGT variables in subjects in families with no IDDM cases

|                       | Subjects (n) | AIR <sub>G</sub> (μU/ml × 10 min) | S <sub>I</sub> (10 <sup>-5</sup> min <sup>-1</sup> · pmol <sup>-1</sup> · l <sup>-1</sup> ) | S <sub>G</sub> (× 100 min <sup>-1</sup> ) | Disposition index (S <sub>I</sub> × AIR <sub>G</sub> ) |
|-----------------------|--------------|-----------------------------------|---------------------------------------------------------------------------------------------|-------------------------------------------|--------------------------------------------------------|
| <b>Men</b>            |              |                                   |                                                                                             |                                           |                                                        |
| Nonaffected spouses   | 49           | 239 ± 193 (169)                   | 4.6 ± 2.6 (4.3)                                                                             | 1.6 ± 0.5 (1.5)                           | 987 ± 789 (817)                                        |
| Nonaffected offspring | 233          | 225 ± 174 (189)                   | 7.3 ± 4.4 (6.5)                                                                             | 1.6 ± 0.5 (1.6)                           | 1340 ± 890 (1,158)                                     |
| <b>Women</b>          |              |                                   |                                                                                             |                                           |                                                        |
| Nonaffected spouses   | 108          | 235 ± 156 (198)                   | 6.4 ± 3.5 (5.8)                                                                             | 1.7 ± 0.6 (1.6)                           | 1348 ± 913 (1,131)                                     |
| Nonaffected offspring | 212          | 206 ± 125 (177)                   | 7.9 ± 4.6 (7.0)                                                                             | 1.9 ± 0.6 (1.8)                           | 1465 ± 942 (1,327)                                     |

Data are means ± SD (median). AIR<sub>G</sub>, acute insulin response to glucose; S<sub>G</sub>, glucose effectiveness; S<sub>I</sub>, insulin sensitivity.

in Finns will play a role in NIDDM risk in non-Finnish populations as well.

### Previous studies

Until recently, genetic studies of NIDDM have focused on the candidate-gene approach. Such studies in Finland have included investigations of the HLA system on chromosome 6 (50), and genes for glycogen synthase (51), glucokinase (52,53), hexokinase II (54,55), GLUT4 (56), fatty acid binding protein (57), apolipoprotein D (58), the insulin receptor substrate 1 (59,60), and the  $\beta_3$ -adrenergic receptor (61). Except for a very significant association between certain HLA haplotypes and NIDDM (50), these studies have not revealed major positive findings.

Recently, results from two whole genome searches for NIDDM have been reported, one based on 330 Mexican-American ASP families from Starr County, Texas (38), the second on 26 moderate-sized Finnish families from western Finland (39). Hanis et al. (38) reported evidence for linkage in several chromosomal regions, with the strongest evidence at the anonymous marker D2S125 on chromosome 2q, and they were able to exclude the existence of a single major locus for NIDDM throughout most of the genome. Mahtani et al. (39) failed to find compelling evidence for linkage anywhere in the genome with their complete sample. However, when they restricted attention to the six families with the lowest mean 30-min insulin level during an OGTT among the affected individuals, they did find evidence for linkage to the MODY3 region of chromosome 12q.

### Rationale for a whole genome search

We have chosen to carry out a whole genome search for genes for NIDDM with linkage analysis using a map with an average resolution of 10 cM. This approach has the advantage of assaying the entire genome. The alternative candidate-gene approach is attractive because of its low cost. However, an approach based solely on candidate genes is unlikely to detect all or even most NIDDM susceptibility loci, because many such genes may be novel with no presently known homologs.

Once a candidate region is identified by linkage analysis, association analysis to identify linkage disequilibrium may help narrow the region of interest. At that stage, identification of candidate genes within the region may prove useful, an approach that has been called positional candidate cloning (62).

### Approaches to maximize power to detect linkage

We have taken several steps intended to maximize power to detect NIDDM genes. First, we have restricted family ascertainment to probands with the relatively early age of diagnosis of clinical diabetes of 35–60 years, because NIDDM is more strongly familial in relatives of early-onset probands (18) and environmental factors are likely to have greater effect at older ages.

Second, we have chosen a sampling design and analytic approach based on ASPs. Compared with the alternative of extended pedigrees, ASPs are easier to ascertain. Furthermore, analysis of ASPs does not require ad hoc specification of mode of inheritance. Instead, allele sharing between affected siblings is compared with expectations assuming no linkage, so that excess allele sharing suggests linkage.

Third, we have sought to minimize the number of families in which both parents are affected with NIDDM. Although such bilineal families can provide linkage information, for most genetic models, linkage information is substantially less than that provided by families with no affected parents or with one affected parent (63). To minimize bilineality, we gave preference to families with living parents and to those families in which one or both parents had lived a long life without known diabetes. Despite these efforts, it is likely that some of our families are bilineal, because only 42 parents in 577 families were available for a study visit, and because in one-sixth of the FUSION study families, neither parent had lived past the age of 61 years without known diabetes.

Fourth, we sought to avoid families with IDDM. Our decision was based on a wish to minimize heterogeneity of the clinical phenotype. During the natural course of NIDDM, the endogenous insulin secretion diminishes, often leading to a requirement for exogenous insulin (64,65). This situation can make it difficult to distinguish NIDDM from adult-onset IDDM, especially with the current trend in NIDDM therapy toward more aggressive treatment with insulin (66). The magnitude of the problem is suggested by results from the Second National Health and Nutrition Examination Survey (NHANES II), in which 7.4% of all diabetic patients were classified as having adult-onset IDDM (67). We have carefully phenotyped affected individuals to identify those with likely IDDM. We used a low serum C-peptide level as a marker for low endogenous insulin secretion, and antibodies to GAD as a

marker for immune process, suggesting probable adult-onset IDDM. While other markers such as ICA and ICA512 antibodies may be less prevalent in older-onset IDDM, GAD antibody prevalence remains high in this age-group (68). Together with thorough medical record review, we classified 43 affected individuals in 39 FUSION families as probable adult-onset IDDM. These families will be excluded from most analyses.

Fifth, we have carried out extensive phenotyping in the families. Many cases of NIDDM are asymptomatic and can only be detected by testing glucose tolerance. In Finland, the proportion of such undetected cases of all NIDDM patients is estimated to be 25–40% (69,70). Thus, as much as possible, family members of NIDDM patients were tested for glucose tolerance to confirm their glucose tolerance status. In addition, we carried out FSIGTs together with Minimal Model analysis (22,71) in the unaffected offspring and spouses of the index case or of an affected sibling in a subset of our families. This approach estimates the individual physiological functions that determine the ability of the human organism to dispose of carbohydrate nutrients, including insulin sensitivity, glucose effectiveness, and acute insulin response. Knowledge of these phenotypes provides the opportunity to separately map the responsible genes for each component of the glucose homeostatic system. Perhaps even more important is that it will provide information to help assess the roles of the genes localized by linkage analysis of NIDDM.

In our study, we found that the nonaffected offspring of NIDDM patients were more insulin sensitive than nonaffected spouses of the patients. There are several factors that may explain this finding. 1) Insulin sensitivity may decline with age (72), although not all studies show the association between biological age and insulin resistance when body weight and distribution of body fat has been taken into account (73,74). In the study by Chen et al. (72), 57- to 82-year-old men had 63% lower insulin sensitivity than 18- to 36-year-old men matched for body weight and fasting glucose. In our study, male spouses had 37% lower insulin sensitivity, and female spouses 19% lower insulin sensitivity, than the offspring. 2) Obesity, abdominal obesity, and hyperglycemia are all well-known factors associated with insulin resistance (73,75). The spouses in our study were more obese than the offspring. Also, waist-to-hip ratios were higher, indicating a higher degree of



abdominal obesity in spouses. Moreover, spouses had slightly higher glucose values in the OGTT than their offspring. 3) Of the spouses, 25% reported diabetes in their parents, suggesting a genetic predisposition to diabetes in some of the nonaffected spouses, with the proportion being approximately the same as expected in the Finnish general population (49,69,70).

Sixth, we have sampled a large number of ASP families. Our power calculations suggest that even 400 ASPs typed on a 10-cM map provide 82% power to detect a gene that confers a 1.8-fold excess risk to siblings of affected individuals at an LOD score of 3.0 (32). Even for a 1.4-fold excess risk, there is 81% power to detect genes at an LOD score of 1.0. Our large sample should also provide an excellent basis for carrying out confirmation studies for linkage or association results reported by other groups.

#### Limitations of the sampling design

Several of the choices we made to maximize power to detect NIDDM genes may have limited the set of NIDDM genes that we will be able to detect. By choosing a relatively homogeneous population such as the Finns, we may have limited the number of segregating genes available for detection. By selecting early diagnosed probands primarily from the NHDR, we are preferentially sampling more severely affected individuals. If the genes for early, more severe NIDDM are different from those for later, less severe disease, we will have increased our power to detect one set of genes at the expense of the other. We believe that increased power to identify a subset of NIDDM genes more than offsets loss of the theoretical opportunity to detect all such genes. By requiring the presence of an ASP, we might be identifying genes for familial NIDDM rather than for all NIDDM. However, given the high degree of familiarity of NIDDM in all populations that have been studied, this problem does not appear to be significant, particularly because genes for familial disease often turn out to have a more general importance (76–78).

Several of these choices also made it more difficult to identify and recruit acceptable families. In Finland, only 3% of symptomatic NIDDM patients have their disease onset before the age of 40 years, and only 37% have it before the age of 60 years (64,79). Our requirement for a second affected sibling and zero or only one parent known to be affected, and our exclusion of families with IDDM, further restricted the

pool of suitable families. Thus, screening more than 22,000 NIDDM patients resulted in only about 1,550 individuals (7%) meeting our study criteria. Even a lower proportion of suitable families was reported from the English study of Cook et al. (80), in which primary screening criteria were less stringent than ours. Their conclusion was to initiate large-scale collaborative multicenter studies to collect the family material necessary for the study of susceptibility genes for NIDDM. In contrast, the FUSION study has demonstrated that it is feasible, although not easy, to collect a large number of ASP families with NIDDM within one population even after applying careful selection criteria.

#### Future directions

Given our success in family collection and phenotypic analysis in the FUSION study, we are moving forward with FUSION 2, in which we hope both to extend our current FUSION families and to obtain additional families. In all our current FUSION families, we will type unaffected siblings to allow more accurate inference of identity by descent in the ASPs for purposes of linkage analysis. In our current FUSION nuclear families, we will sample a spouse and offspring of one of the affected siblings for purposes of haplotype determination and linkage disequilibrium mapping. We also plan to identify and sample a second set of Finnish families as a replication set to allow us to immediately test interesting chromosomal regions in a second, comparable set of families. In addition, we will obtain a sample of parent-offspring trios, in which the offspring is affected with NIDDM and the parents are living, to allow family-based association studies (81).

Even given a large initial sample of families and a second replication sample, detection of NIDDM susceptibility genes by linkage analysis will depend on a combination of hard work and good luck. Most critical will be the magnitude of the effect of the various susceptibility genes on disease risk. With a combined sample of perhaps 800 ASPs, we would have 69% power to detect a locus with the impact estimated by Hanis et al. (38) for their chromosome 2q locus at an LOD score of 3.0. However, for a locus that confers a 1.2-fold excess risk to siblings, even 800 ASPs would be expected to provide an LOD score of only 1.59 (32). Thus, in genetic studies of NIDDM and other common, complex genetic diseases, sharing results with other workers in the field and combining data from comparable

samples will be critical to our success in identifying disease susceptibility genes.

**Acknowledgments**— This project was made possible by intramural funds from the National Human Genome Research Institute (NHGRI) (OH95-C-N030) and by R01 HG00376. Family studies were approved by the Institutional Review Board at the National Institutes of Health (SPA S-5737-05) and at the National Public Health Institute in Helsinki, Finland. R.M.W. and C.D.L. were supported by training grant T32 HG00040 from the NIH; R.M.W. is currently supported by individual postdoctoral award F32 DK09525. We are grateful to the National Public Health Institute for funding the lipid assays and HLA typing. The work of Paula Nyholm, Jouko Sundvall, Tuula Tenkula, and Sanelma Villkilä is appreciated. We also thank Upjohn Pharmaceuticals for kindly donating tolbutamide (Orinase Diagnostic) for the FSIGTs.

We gratefully acknowledge the excellent work of Gunther Birznieks, Peter Chines, William Eldridge, Zarir Karanjawala, Julie Knapp, Colin Martin, Anjené Musick, Tiffany Musick, Joseph Rayman, Shane Shapiro, Alistair So, Joyce Tannenbaum, Catherine Te, Ray Whiten, and Alyson Witt at NHGRI, and Edward Trager and Peggy White at the University of Michigan.

#### References

- King H, Rewers M: Global estimates for prevalence of diabetes mellitus and impaired glucose tolerance in adults: WHO Ad Hoc Diabetes Reporting Group. *Diabetes Care* 16:157–177, 1993
- Pincus G, White P: On the inheritance of diabetes mellitus. I. An analysis of 675 family histories. *Am J Med Sci* 186:1–14, 1933
- Cammidge PJ: Heredity as a factor in the aetiology of diabetes mellitus. *Lancet* i:393–395, 1934
- Hanhart E: Neue Beiträge zur Kenntnis der Vererbung des diabetes mellitus. *Helv Med Acta* 14:243–262, 1947
- Harris H: The familial distribution of diabetes mellitus: a study of the relatives of 1241 diabetic propositi. *Ann Eugenics* 15:95–119, 1950
- Barnett AH, Eff C, Leslie RDG, Pyke DA: Diabetes in identical twins: a study of 200 pairs. *Diabetologia* 20:87–93, 1981
- Newman B, Selby JV, King MC, Slemenda C, Fabsitz R, Friedman GD: Concordance for type 2 (non-insulin-dependent) diabetes mellitus in male twins. *Diabetologia* 30:763–768, 1987
- Lo SS, Tun RY, Hawa M, Leslie RD: Studies of diabetic twins. *Diabetes Metab Rev* 7:223–238, 1991
- Kaprio J, Tuomilehto J, Koskenvuo M, Romanov K, Reunanen A, Eriksson J,



- Stengård J, Kesäniemi YA: Concordance for type 1 (insulin-dependent) and type 2 (non-insulin-dependent) diabetes mellitus in a population-based cohort of twins in Finland. *Diabetologia* 35:1060–1067, 1992
10. Rich SS: Mapping genes in diabetes: genetic epidemiological perspective. *Diabetes* 39:1315–1319, 1993
  11. Ghosh S, Schork NJ: Genetic analysis of NIDDM: the study of quantitative traits. *Diabetes* 45:1–14, 1996
  12. Leslie RDG, Volkman HP, Poncher M, Hanning I, Orskov H, Alberti KGMM: Metabolic abnormalities in children of non-insulin dependent diabetics. *Br Med J* 293:840–842, 1986
  13. Pettitt DJ, Aleck KA, Baird HR, Carraher MJ, Bennett PH, Knowler WC: Congenital susceptibility to NIDDM. Role of intrauterine environment. *Diabetes* 37:622–628, 1988
  14. Lillioja S, Mott DM, Zawadzki JK, Young AA, Abbot WGH, Knowler WC, Bennett PH, Moll P, Bogardus C: In vivo insulin action is a familial characteristic in nondiabetic Pima Indians. *Diabetes* 36:1329–1335, 1987
  15. Eriksson J, Franssila-Kallunki A, Ekstrand A, Saloranta C, Widen E, Schalin C, Groop L: Early metabolic defects in persons at increased risk for non-insulin-dependent diabetes mellitus. *N Engl J Med* 321:337–343, 1989
  16. Thomas F, Balkau B, Vauzelle-Kervroedan F, Papoz L: Maternal effect and familial aggregation in NIDDM: the CODIAB Study: CODIAB-INSERM-ZENECA Study Group. *Diabetes* 43:63–67, 1994
  17. Lillioja S, Mott DM, Spraul M, Ferraro R, Foley JE, Ravussin E, Knowler WC, Bennett PH, Bogardus C: Insulin resistance and insulin secretory dysfunction as precursors of non-insulin-dependent diabetes mellitus. *N Engl J Med* 329:1988–1992, 1993
  18. Mitchell BD, Kammerer CM, Reinhart LJ, Stern MP: NIDDM in Mexican-American families: heterogeneity by age of onset. *Diabetes Care* 17:567–573, 1994
  19. Strandberg TE, Tilvis RS, Lindberg O, Valvanne J, Sairanen S, Ehnholm C, Tuomilehto J: High plasma insulin associates with lower LDL cholesterol in elderly individuals. *Atherosclerosis* 121:267–273, 1996
  20. World Health Organization: *Diabetes Mellitus: Report of a WHO Study Group*. Geneva, World Health Org., 1985 (Tech. Rep. Ser., no. 727)
  21. Bergman RN, Yang YJ, Hope ID, Ader M: The role of the transcapillary insulin transport in the efficiency of insulin action: studies with glucose clamps and the minimal model. *Horm Metab Res* 24:49–56, 1990
  22. Bergman RN: Toward physiological understanding of glucose tolerance: minimal-model approach. *Diabetes* 38:1512–1527, 1989
  23. Ward WK, Bolgiano DC, McKnight B, Halter JB, Porte D Jr: Diminished B cell secretory capacity in patients with non-insulin-dependent diabetes mellitus. *J Clin Invest* 74:1318–1328, 1984
  24. Herbert V, Law K, Gottlieb C, Bleicher S: Coated charcoal immunoassay of insulin. *J Clin Endocrinol Metab* 25:1375–1384, 1965
  25. Hagopian WA, Karlsen AE, Gottsäter A, Landin-Olsson M, Grubin CE, Sundkvist G, Petersen JS, Boel E, Dyrberg T, Lernmark A: Quantitative assay using recombinant human islet glutamic acid decarboxylase (GAD65) shows that 64K autoantibody positivity at onset predicts diabetes type. *J Clin Invest* 91:368–374, 1993
  26. Hagopian WA, Sanjeevi CB, Kockum I, Landin-Olsson M, Karlsen AE, Sundkvist G, Dahlquist G, Palmer J, Lernmark A: Glutamate decarboxylase-, insulin- and islet cell-antibodies and HLA typing to detect diabetes in a general population-based study of Swedish children. *J Clin Invest* 95:1505–1511, 1995
  27. Schmidli RS, Colman PG, Bonifacio E, Bottazzo GF, Harrison LC: High level of concordance between assays for glutamic acid decarboxylase antibodies: the First International Glutamic Acid Decarboxylase Antibody Workshop. *Diabetes* 43:1005–1009, 1994
  28. Jaffe M: Über den Niederschlag, welchen Pikrinsäure in normalem Harn erzeugt und über eine neue Reaction des Kreatinins. *Z Physiol Chem* 10:391–400, 1886
  29. Gerbaut T: Immunoturbidimetry of albumin in serum, cerebrospinal fluid, and urine with a unique calibration curve (Abstract). *Clin Chem* 33:1260–1261, 1987
  30. Ghosh S, Karanjawala ZE, Hauser ER, Ally D, Knapp JI, Rayman JB, Musick A, Tannenbaum J, Te C, Shapiro S, Eldridge W, Musick T, Martin C, Smith JR, Carpten JD, Brownstein MJ, Powell JI, Whiten R, Chines P, Nylund SJ, Magnuson VM, Boehnke M, Collins FS, the FUSION Study Group: Methods for precise sizing, automated binning of alleles and reduction of error rates in large-scale genotyping using fluorescently labeled dinucleotide markers. *Genome Res* 7:165–178, 1997
  31. Tuomilehto-Wolf E, Tuomilehto J, Cepaitis Z, Lounamaa R, the DIME Study Group: New susceptibility haplotype for type 1 diabetes. *Lancet* ii:299–302, 1989
  32. Hauser ER, Boehnke M, Guo SW, Risch N: Affected-sib-pair interval mapping and exclusion for complex genetic traits: sampling considerations. *Genetic Epidemiol* 13:117–137, 1996
  33. Risch N: Linkage strategies for genetically complex traits. II. The power of affected relative pairs. *Am J Hum Genet* 46:229–241, 1990
  34. Kruglyak L, Lander ES: Complete multipoint sib-pair analysis of qualitative and quantitative traits. *Am J Hum Genet* 57:439–454, 1995
  35. Haseman JK, Elston RC: The investigation of linkage between a quantitative trait and a marker locus. *Behav Genet* 2:3–19, 1972
  36. Amos CI, Zhu DK, Boerwinkle E: Assessing genetic linkage and association with robust components of variance. *Ann Hum Genet* 60:143–160, 1996
  37. Valle T, Reunanen A, Koivisto V, Kangas T, Rissanen A: The glycemetic control in patients with diabetes in Finland (Abstract). *Diabetologia* 39 (Suppl. 1):A28, 1996
  38. Hanis CL, Boerwinkle E, Chakraborty R, Ellworth DL, Concannon P, Stirling B, Morrison VA, Wapelhorst B, Spielman RS, Gogolin-Ewens KJ, Shepard JM, Williams SR, Risch N, Hinds D, Iwasaki N, Ogata M, Omori Y, Petzold C, Rietzsch H, Schröder HE, Schulze J, Cox NJ, Menzel S, Boriraj VV, Chen X, Lim LR, Lindner T, Mereu LE, Wang YQ, Xiang K, Yamagata K, Yang Y, Bell GI: A genome-wide search for human non-insulin-dependent (type 2) diabetes genes reveals a major susceptibility locus on chromosome 2. *Nat Genet* 13:161–166, 1996
  39. Mahtani MM, Widen E, Lehto M, Thomas J, McCarthy M, Brayer J, Bryant B, Chan G, Daly M, Forsblom C, Kanninen T, Kirby A, Kruglyak L, Munnely K, Parkkonen M, Reeve-Daly MP, Weaver A, Brettin T, Duyk G, Lander ES, Groop LC: Mapping of a gene for type 2 diabetes associated with an insulin secretion defect by a genome scan in Finnish families. *Nat Genet* 14:90–94, 1996
  40. Stern MP, Duggirala R, Mitchell BD, Reinhart LJ, Shivakumar S, Shipman PA, Uresandi OC, Benavides E, Blangero J, O'Connell P: Evidence for linkage of regions on chromosomes 6 and 11 to plasma concentrations in Mexican Americans. *Genome Res* 6:724–734, 1996
  41. Thompson DB, Janssen RC, Ossowski VM, Prochazka M, Knowler WC, Bogardus C: Evidence of linkage between a region on chromosome 1p and the acute insulin response in Pima Indians. *Diabetes* 44:478–481, 1995
  42. Raffel LJ, Robbins DC, Norris JM, Boerwinkle E, DeFronzo RA, Elbein SC, Fujimoto W, Hanis CL, Kahn SE, Permutt MA, Chiu KC, Cruz J, Ehrmann DA, Robertson RP, Rotter JI, Buse J: The GENNID Study: a resource for mapping the genes that cause NIDDM. *Diabetes Care* 19:864–872, 1996
  43. de la Chapelle A: Disease gene mapping in isolated human populations: the example of Finland. *J Med Genet* 30:857–865, 1993
  44. Sajantila A, Salem AH, Savolainen P, Bauer K, Gierig C, Pääbo S: Paternal and maternal DNA lineages reveal a bottleneck in the founding of the Finnish population. *Proc Natl Acad Sci USA* 93:12035–12039, 1996
  45. Nevanlinna HR: The Finnish population structure: a genetic and genealogical study. *Hereditas* 71:195–236, 1972
  46. Hästbacka J, de la Chapelle A, Kaitila I, Sis-

- tonen P, Weaver A, Lander E: Linkage disequilibrium mapping in isolated founder populations: diastrophic dysplasia in Finland. *Nat Genet* 2:204–211, 1993
47. Ikonen E, Baumann M, Grön K, Syvänen AC, Enomaa N, Halila R, Aula P, Peltonen L: Aspartylglucosaminuria: cDNA encoding human aspartylglucosaminidase and the missense mutation causing the disease. *EMBO J* 10:51–58, 1991
  48. Kestilä M, Männikkö M, Holmberg C, Gypay G, Weissenbach J, Savolainen ER, Peltonen L, Tryggvason K: Congenital nephrotic syndrome of the Finnish type maps to the long arm of chromosome 19. *Am J Hum Gen* 54:757–764, 1994
  49. Valle T, Tuomilehto J, Eriksson J: Epidemiology of NIDDM in Europeans. In *International Textbook of Diabetes Mellitus*. 2nd ed. Alberti KGMM, Zimmet P, DeFronzo RA, Keen H, Eds. Chichester, U.K., Wiley, 1997, p. 125–142
  50. Tuomilehto-Wolf E, Tuomilehto J, Hitman G, Nissinen A, Stengård J, Pekkanen J, Kivinen P, Kaarsalo E, Karvonen M: Genetic susceptibility to non-insulin dependent diabetes mellitus and glucose intolerance are located in HLA region. *BMJ* 307:155–159, 1993
  51. Groop LC, Kankuri M, Schalin-Jäntti C, Ekstrand A, Nikula-Ijäs P, Widen E, Kuusimäen E, Eriksson J, Franssila-Kallunki A, Saloranta C: Association between polymorphism of the glycogen synthase gene and non-insulin-dependent diabetes mellitus. *N Engl J Med* 328:10–14, 1993
  52. McCarthy M, Hitman G, Hitchins M, Riikonen A, Stengård J, Nissinen A, Tuomilehto-Wolf E, Tuomilehto J: Glucokinase gene polymorphisms: a genetic marker for glucose intolerance in a cohort of elderly Finnish men. *Diabet Med* 11:198–204, 1994
  53. Laakso M, Malkki M, Kekäläinen P, Kuusisto J, Mykkänen L, Deeb SS: Glucokinase gene variants in subjects with late-onset NIDDM and impaired glucose tolerance. *Diabetes Care* 18:398–400, 1995
  54. Laakso M, Malkki M, Deeb SS: Amino acid substitutions in hexokinase II among patients in NIDDM. *Diabetes* 44:330–334, 1995
  55. Laakso M, Malkki M, Kekäläinen P, Kuusisto J, Deeb SS: Polymorphism of the human hexokinase II gene: lack of association with NIDDM and insulin resistance. *Diabetologia* 38:617–622, 1995
  56. Eriksson J, Koranyi L, Bourey R, Schalin-Jäntti C, Widen E, Mueckler M, Permutt AM, Groop LC: Insulin resistance in type 2 (non-insulin-dependent) diabetic patients and their relatives is not associated with a defect in the expression of the insulin-responsive glucose transporter (GLUT-4) gene in human skeletal muscle. *Diabetologia* 35:143–147, 1992
  57. Humphreys P, McCarthy M, Tuomilehto J, Tuomilehto-Wolf E, Stratton I, Morgan R, Rees A, Owens D, Stengård J, Nissinen A, Hitman G, Turner R, O'Rahilly S: Chromosome 4q locus associated with insulin resistance in Pima Indians: studies in three European non-insulin dependent diabetic populations. *Diabetes* 43:800–804, 1994
  58. Baker W, Hitman G, Hawrami K, McCarthy M, Riikonen A, Tuomilehto-Wolf E, Nissinen A, Tuomilehto J, Mohan V, Viswanathan M, Snehalata C, Ramachandran A, Dowse G, Zimmet P, Serjeantson S: Apolipoprotein D gene polymorphism; a new genetic marker for type 2 (non-insulin dependent) diabetic subjects in Nauru and South India. *Diabet Med* 11:947–952, 1994
  59. Laakso M, Malkki M, Kekäläinen P, Kuusisto J, Deeb SS: Insulin receptor substrate-1 variants in non-insulin-dependent diabetes. *J Clin Invest* 94:1141–1146, 1994
  60. Hitman G, Hawrami K, McCarthy M, Wiswanathan M, Snehalata C, Ramachandran A, Tuomilehto J, Tuomilehto-Wolf E, Nissinen A, Pedersen OB: Insulin receptor substrate-1 gene mutations in non-insulin dependent diabetes: implications for the study of polygenic disease. *Diabetologia* 38:481–486, 1995
  61. Widen E, Lehto M, Kanninen T, Walston J, Shuldiner AR, Groop LC: Association of a polymorphism in the beta 3-adrenergic-receptor gene with features of the insulin resistance syndrome in Finns. *N Engl J Med* 333:348–351, 1995
  62. Collins FS: Positional cloning: let's not call it reverse anymore. *Nat Genet* 1:3–6, 1992
  63. Schork NJ, Boehnke M, Terwilliger JD, Ott J: Two-trait-locus linkage analysis: a powerful strategy for mapping complex genetic traits. *Am J Hum Genet* 53:1127–1136, 1993
  64. Eriksson J, Forsen B, Häggblom M, Teppo AM, Groop L: Clinical and metabolic characteristics of type 1 and type 2 diabetes: an epidemiological study from the Närpes community in Western Finland. *Diabet Med* 9:654–660, 1992
  65. Niskanen L, Karjalainen J, Siitonen O, Uusitupa M: Metabolic evolution of type 2 diabetes: a 10-year follow-up from the time of diagnosis. *J Intern Med* 236:263–270, 1994
  66. Yki-Järvinen H, Kauppila M, Kujansuu E, Lahti J, Marjanen T, Niskanen L, Rajala S, Ryysy L, Salo S, Seppälä P, Tulokas T, Viikari J, Karjalainen J, Taskinen MR: Comparison of insulin regimens in patients with non-insulin-dependent diabetes mellitus. *N Engl J Med* 327:1426–1433, 1992
  67. Harris MI, Robbins DC: Prevalence of adult-onset IDDM in the U.S. population. *Diabetes Care* 17:1337–1340, 1994
  68. Mayrhofer M, Rabin DU, Messenger L, Standl E, Ziegler AG: Value of ICA512 antibodies for prediction and diagnosis of type 1 diabetes. *Exp Clin Endocrinol Diabetes* 104:228–234, 1996
  69. Mykkänen L, Laakso M, Uusitupa M, Pyörälä K: Prevalence of diabetes and impaired glucose tolerance in elderly subjects and their association with obesity and family history of diabetes. *Diabetes Care* 13:1099–1105, 1990
  70. Tuomilehto J, Korhonen HJ, Kartovaara L, Salomaa V, Stengård JH, Pitkaniemi M, Aro A, Javela K, Uusitupa M, Pitkaniemi J: Prevalence of diabetes mellitus and impaired glucose tolerance in the middle-aged population of three areas in Finland. *Int J Epidemiol* 20:1010–1017, 1991
  71. Bergman RN, Phillips LS, Cobelli C: Physiologic evaluation of factors controlling glucose tolerance in man: measurement of insulin sensitivity and B-cell glucose sensitivity from the response to intravenous glucose. *J Clin Invest* 68:1456–1467, 1981
  72. Chen M, Bergman RN, Pacini G, Porte D: Pathogenesis of age-related glucose intolerance in man: insulin resistance and decreased  $\beta$ -cell function. *J Clin Endocrinol Metab* 60:13–20, 1985
  73. Kohrt WM, Kirwan JP, Staten MA, Bourey RE, King DS, Holloszy JO: Insulin resistance in aging is related to abdominal obesity. *Diabetes* 42:273–281, 1993
  74. Ferrannini E, Vichi S, Beck-Nielsen H, Laakso M, Paolisso G, Smith U: Insulin action and age. *Diabetes* 45:947–953, 1996
  75. Yki-Järvinen H: Role of insulin resistance in the pathogenesis of NIDDM. *Diabetologia* 38:1378–1388, 1995
  76. Saunders AM, Strittmatter WJ, Schmechel D, St. George-Hyslop PH, Pericak-Vance MA, Joo SH, Rosi BL, Gusella JF, Crapper-MacLachlan DR, Alberts MJ, Hulette C, Crain B, Goldgaber D, Roses AD: Association of apolipoprotein E allele epsilon 4 with late-onset familial and sporadic Alzheimer's disease. *Neurology* 43:1467–1472, 1993
  77. Davies JL, Kawaguchi Y, Bennett ST, Copeman JB, Cordell HJ, Pritchard LE, Reed PW, Gough SCL, Jenkins SC, Palmer SM, Balfour KM, Rowe BR, Farrall M, Barnett AH, Bain SC, Todd JA: A genome-wide search for human type 1 diabetes susceptibility genes. *Nature* 371:130–136, 1994
  78. Tuomilehto-Wolf E, Tuomilehto J, the DiMe Study Group: Is the high incidence of diabetes in young children diagnosed under the age of 4 years determined by genetic factors in Finland? *Diabete Metab* 19:167–172, 1993
  79. Laakso M, Pyörälä K: Age of onset and type of diabetes. *Diabetes Care* 8:114–117, 1985
  80. Cook JTE, Page RCL, O'Rahilly S, Levy J, Holman R, Barrow B, Hattersley AT, Shaw AG, Wainscoat JS, Turner RC: Availability of type II diabetic families for detection of diabetes susceptibility genes. *Diabetes* 42:1536–1543, 1993
  81. Falk CT, Rubenstein P: Haplotype relative risks: an easy reliable way to construct a proper control sample for risk calculations. *Ann Hum Genet* 51:227–233, 1987

# Prevalences of Type 2 Diabetes, the Insulin Resistance Syndrome, and Coronary Heart Disease in an Elderly, Biethnic Population

ROBERT D. LINDEMAN, MD  
LINDA J. ROMERO, MD  
ROSALINA HUNDLEY, MA  
ANDREW S. ALLEN, MS  
HWA CHI LIANG, MS

RICHARD N. BAUMGARTNER, PHD  
KATHLEEN M. KOEHLER, PHD  
DAVID S. SCHADE, MD  
PHILIP J. GARRY, PHD

**OBJECTIVE** — To compare the prevalences of type 2 diabetes, the various cardiovascular risk factors encompassing the insulin resistance syndrome (IRS), and coronary heart disease (CHD) in elderly Hispanics compared with non-Hispanic whites.

**RESEARCH DESIGN AND METHODS** — Elderly Hispanics ( $n = 414$ ) and non-Hispanic whites ( $n = 469$ ), randomly selected from the Medicare rolls of Bernalillo County (Albuquerque, NM; age  $\geq 65$  years), underwent a home interview followed by an interview/examination by a nurse-practitioner, nurse, and nutritionist that included an evaluation of glucose tolerance. Prevalences of total and central obesity, dyslipidemia, hypertension, and microalbuminuria also were determined. History of myocardial infarction, recent angina, and/or coronary bypass graft, and electrocardiograms (ECGs) were used to document CHD.

**RESULTS** — Elderly Hispanics had twice the prevalence of type 2 diabetes compared with non-Hispanic whites, but the prevalence of impaired glucose tolerance was not increased in Hispanics. Mean serum fasting and 2-h post-glucose insulin concentrations, fasting insulin resistance indexes, and HbA<sub>1c</sub> were higher in Hispanics. Hispanics were shorter, weighed less, and had more total body and central obesity. The higher prevalences of dyslipidemia in Hispanics could be explained by a higher prevalence of diabetes. The prevalences of hypertension and CHD were not different for the two ethnic groups.

**CONCLUSIONS** — Elderly Hispanics had twice the prevalence of diabetes and higher prevalences of cardiovascular risk factors associated with IRS. Prevalences of hypertension and CHD were similar in the two ethnic groups.

All Hispanic populations appear to share the common characteristic of a high prevalence of type 2 diabetes (1). Analysis of the Hispanic Health and Nutrition Examination Survey (HHANES) database on self-report and laboratory

findings in the 65- to 74-year-old age-group indicate a prevalence of diabetes of 33% in Hispanics (Mexican-Americans, Cuban-Americans, and Puerto Ricans) compared with 17% in non-Hispanic whites (2).

Reaven et al. (3) described an insulin resistance syndrome (IRS), characterized by hyperinsulinemia, central or visceral obesity, dyslipidemia with high triglyceride and low HDL cholesterol concentrations, and hypertension. Microalbuminuria later was added to this syndrome as a risk factor for both diabetes and coronary heart disease (CHD). The Hispanics in the Southwest have been reported to have an increased prevalence of this IRS as evidenced by increased fasting insulin concentrations (4). They also have impaired insulin secretion in response to an increase in blood glucose, which contributes to the development of diabetes (5,6).

Hispanic generally is defined as having a Spanish surname, being Spanish-speaking, or originating from a Spanish-speaking country. This classification refers to a very heterogeneous population of individuals who vary markedly in their demographic characteristics and geographic distribution in different parts of the U.S. In the Southwest, there are two major subpopulations of Hispanics, those referring to themselves as Mexican-Americans, whose ancestors immigrated to the U.S. from Mexico, and Spanish-Americans, whose ancestors have lived there  $>300$  years. Of our study population, 83% self-identified as Spanish-American, 10% as Mexican-American, 5% as Hispanic-Native Americans, and 3% as other Hispanics (e.g., Cuban, Puerto Rican, and Central and South American).

Although southwestern Hispanics (Mexican-Americans) have a higher prevalence of diabetes and IRS than non-Hispanic whites, their cardiovascular mortality and prevalence of myocardial infarction by electrocardiogram (ECG) and interview have been reported, at least among men, to be about 15–20% lower (7–9). The San Luis Valley Diabetes Study (Spanish-Americans from rural southern Colorado) reported no decrease in coronary artery disease prevalence in this subpopulation of southwestern Hispanics versus non-Hispanic whites (10). However, these Hispanic men with diabetes appeared to be at no greater risk for CHD than men without diabetes, in contrast to

From the Departments of Medicine (R.D.L., R.H., A.S.A., H.C.L., R.N.B., K.M.K., D.S.S.), Family and Community Medicine (L.J.R.), and Pathology (P.J.G.), University of New Mexico School of Medicine, Albuquerque, New Mexico.

Address correspondence and reprint requests to Dr. Robert D. Lindeman, Department of Medicine, University of New Mexico Hospital, ACC-5, 2211 Lomas Blvd, N.E., Albuquerque, NM 87131. E-mail: rlindema@salud.unm.edu.

Received for publication 29 September 1997 and accepted in revised form 4 March 1998.

R.D.L. holds stock in Merck and has received honoraria and consulting fees from Merck and Pfizer.

**Abbreviations:** ANOVA, analysis of variance; CABG, coronary artery bypass graft; CHD, coronary heart disease; ECG, electrocardiogram; FIRI, fasting insulin resistance index; HOMA-IR, homeostasis model assessment; IRS, insulin resistance syndrome; RIA, radioimmunoassay; STSR, subscapular-to-triceps skinfold ratio; WHR, waist-to-hip ratio; WTR, waist-to-thigh ratio.

almost a twofold increase in risk for diabetic compared with nondiabetic non-Hispanic men. Among diabetic Hispanic women, there was an increased risk, but not nearly as great as for diabetic non-Hispanic white women. This suggests the presence of some, as yet unidentified, genetic or lifestyle factor that is cardioprotective, especially in diabetic Hispanics.

The purpose of this study was to compare the prevalences of type 2 diabetes and measures of IRS (total and central obesity, carbohydrate metabolism, dyslipidemia, i.e., low HDL cholesterol and high triglyceride concentrations, hypertension, and microalbuminuria), both recognized risk factors for CHD, and CHD in a randomly selected population of elderly (age  $\geq 65$  years) New Mexico Hispanics compared with non-Hispanic whites. Our hypotheses were as follows: 1) do the same differences in measures of IRS exist between diabetic and nondiabetic Hispanics as have been observed in non-Hispanic whites, and 2) do the nondiabetic populations of each ethnic/sex group continue to exhibit similar differences in these measures as seen in the total populations? Finally, 3) is the prevalence of CHD lower in this elderly Hispanic population compared with non-Hispanic whites, and 4) is the presence of diabetes less likely to have an impact on the prevalence of CHD in this Hispanic population compared with non-Hispanic whites as reported earlier in a younger population of Hispanics of similar heritage (10)?

## RESEARCH DESIGN AND METHODS

### Participants

A total of 2,200 prospective participants were randomly selected from 50,700 Health Care Financing Authority (HCFA) registrants (Medicare recipients), age  $\geq 65$  years, residing in Bernalillo County (Albuquerque, NM). After eliminating those people who died or moved from the county, who could not be located (only a post office box address was available or there was no response to notes left at homes), or who were ineligible because they did not meet criteria to qualify as Hispanics or non-Hispanic whites, 1,666 eligible participants were contacted. Of these, 1,130 (67.8%) participated in home interviews. An additional 29 interviewees were found not to qualify for the survey because they either did not meet ethnicity standards (self-identity and three of four grandparents who were Hispanic or non-Hispanic white,

respectively) or had died or moved after the home interview and before an examination could be completed. Of the 1,637 individuals found eligible, 883 (54.0%) participated in a 4-h interview/examination by a nurse-practitioner, nurse, and nutritionist. All participants were offered transportation to the University of New Mexico Senior Health Center (clinic) where 88.9% of the interviews/examinations were performed. Those unwilling or unable to travel were interviewed and examined at home (9.7%) or in a nursing home (1.4%). Interviews were obtained directly from the participant 96% of the time, and from a spouse, relative, or caretaker 4% of the time. All participants gave a written informed consent and the research was approved and monitored by the Human Research Review Committee of the University of New Mexico Health Sciences Center.

### Study design

Information collected on each participant included histories of acute myocardial infarction or angina pectoris (self-report of a physician diagnosis), coronary artery bypass graft (CABG) surgery, chest pain within the last 6 months with at least two of the five qualifiers (substernal in location; radiates to jaw, neck, or left arm; brought on by exercise; relieved by rest or nitroglycerin; associated with shortness of breath, nausea, vomiting, or sweating), which made angina or myocardial infarction the likely etiology, diabetes with information on current use of insulin and oral hypoglycemics, and other current medication usage, specifically antihypertensive medications. Procedures included a standing and lying blood pressure and a 12-lead ECG with computer interpretation (MAC-VU, Marquette Electronics, Milwaukee, WI) overread by a cardiologist.

Anthropometric measurements included height, weight, subscapular and triceps skinfold thicknesses, and waist, hip, and thigh circumferences using techniques previously described (11). BMI was calculated as weight (kilograms) divided by height (meters squared). All measurements were taken twice by one of two nurses, except skinfolds, which were measured three times. The values reported were the means of the repeated measurements.

Blood samples were drawn between 8:00 and 8:30 A.M. after an overnight fast and assayed for serum glucose, insulin, HbA<sub>1c</sub>, total cholesterol, HDL cholesterol, and triglyceride concentrations. LDL cho-

lesterol was calculated by subtracting the HDL cholesterol plus triglyceride divided by 5 from the total cholesterol, unless the triglyceride exceeded 4.5 mmol/l (400 mg/dl), in which case this determination was not calculated. Serum C-peptide concentrations were determined only for diabetic participants on insulin. Unless the participant was on insulin and/or oral hypoglycemic agents or had a fasting glucose level  $>8.3$  mmol/l (150 mg/dl) (Hemo Cue B-glucose, Hemo Cue, Mission Viejo, CA), they were asked to ingest 75 g of glucola over a 10-min period, and a blood sample was obtained 2 h later for serum glucose and insulin determinations. A random urine sample was obtained for urinalysis and dipstick analysis for microalbuminuria.

### Methodology

Glucose was determined by a hexokinase enzymatic assay using a Roche-Cobas Bio instrument and reagents from Beckman Instruments (Carlsbad, CA). Insulin concentration was determined using a radioimmunoassay (RIA) from Diagnostic Products (Los Angeles, CA). HbA<sub>1c</sub> was determined by a RIA from Endocrine Science Products (Calabasas Hill, CA). Total cholesterol and triglyceride concentrations were determined by an autoanalyzer as part of an SMAC-20 panel. HDL cholesterol was determined by an enzymatic method after selective precipitation with dextran sulfate and magnesium (HDL cholesterol [dextran sulfate] method for ABA-100; Sigma Diagnostics, St. Louis, MO, revised 1989). Serum C-peptide was determined by an RIA from Instar (Stillwater, MN).

Participants were placed in one of four categories based on World Health Organization (WHO) recommendations recently modified by the American Diabetes Association's Report of the Expert Committee on the Diagnosis and Classification of Diabetes Mellitus (12). Participants were considered to be diabetic if they were on insulin (serum C-peptide determinations were used to document type 2 diabetes), and/or oral hypoglycemic agents. They were also considered diabetic if their fasting serum glucose was  $\geq 7.0$  mmol/l (126 mg/dl) or their 2-h post-glucola glucose was  $\geq 11.1$  mmol/l (200 mg/dl). Participants were considered to have impaired glucose tolerance if their fasting serum glucose was  $\geq 6.1$  mmol/l (110 mg/dl) but  $<7.0$  mmol/l or their 2-h glucose was  $\geq 7.8$  mmol/l (140 mg/dl) but  $<11.1$  mmol/l, and also if they did not meet criteria that would otherwise place

**Table 1—Prevalence of type 2 diabetes, impaired glucose tolerance, and normal glucose tolerance by ethnicity and sex in the New Mexico Elder Health Survey using the new criteria proposed by the Expert Committee on the Diagnosis and Classification of Diabetes Mellitus**

|                                                | Men        |                    | Women     |                    |
|------------------------------------------------|------------|--------------------|-----------|--------------------|
|                                                | Hispanic   | Non-Hispanic white | Hispanic  | Non-Hispanic white |
| Diabetes                                       |            |                    |           |                    |
| Insulin                                        | 16 (7.3)   | 16 (6.5)           | 11 (5.7)  | 4 (1.8)            |
| Oral hypoglycemics                             | 18 (8.2)   | 8 (3.3)            | 12 (6.2)  | 9 (4.0)            |
| Diagnosed, untreated                           | 3 (1.4)    | 1 (0.4)            | 0 (0)     | 0 (0)              |
| Newly diagnosed                                | 34 (15.4)  | 19 (7.8)           | 24 (12.4) | 13 (5.8)           |
| Total                                          | 71 (32.3)  | 44 (18.0)          | 47 (24.3) | 26 (11.6)          |
| Impaired fasting glucose and/or tolerance test | 41 (18.6)  | 48 (19.6)          | 45 (23.2) | 41 (18.3)          |
| Normal fasting glucose and/or tolerance test   | 100 (45.5) | 141 (57.6)         | 92 (47.4) | 143 (63.8)         |
| Indeterminate                                  | 8 (3.6)    | 12 (4.9)           | 10 (5.2)  | 14 (6.8)           |

Data are n (%).

them in the diabetic category. Participants were considered to have a normal glucose tolerance if their fasting serum glucose was  $<6.1$  mmol/l and/or the 2-h glucose was  $<7.8$  mmol/l, and also if no criteria placed them in either of the first two categories. The remaining participants were listed as indeterminate, generally because permission was not obtained for a blood sample, or the participant arrived not fasting.

Participants were considered to be overweight or obese if their BMI was  $\geq 27.0$  kg/m<sup>2</sup>. Waist-to-hip ratio (WHR) was considered high if  $\geq 1.0$  in men and  $\geq 0.9$  in women. Waist-to-thigh ratio (WTR) was considered high if  $\geq 2.2$  in men and  $\geq 2.1$  in women. Subscapular-to-triceps skinfold ratio (STSR) was considered high if  $\geq 2.2$  in men and  $\geq 1.2$  in women. Serum lipid concentrations were considered abnormal when the total cholesterol was  $\geq 6.2$  mmol/l (240 mg/dl), serum HDL cholesterol was  $<0.9$  mmol/l (35 mg/dl), triglyceride was  $\geq 2.3$  mmol/l (200 mg/dl), and the calculated LDL cholesterol was  $\geq 4.1$  mmol/l (160 mg/dl).

A participant was considered to be hypertensive if they were currently being treated with antihypertensive agents, if the systolic blood pressure was  $\geq 160$  mmHg, and/or if the diastolic blood pressure was  $\geq 95$  mmHg. Insulin resistance was determined from both the fasting serum insulin concentration ( $\geq 90$  pmol/l [15  $\mu$ U/ml]) and by calculating a fasting insulin resistance index (FIRI)  $\geq 2.2$  using methodology similar to that proposed by Duncan et al. (13). These authors describe an index that was derived from the product of the

serum insulin and glucose concentrations divided by a constant, specifically 25 (normalized to an expected glucose of 5 mmol/l and insulin of 5  $\mu$ U/l to give a reference range centered around unity). We modified this constant based on the mean values obtained using all of our nonobese, nondiabetic participants (mean serum glucose of 4.92 mmol/l [88.6 mg/dl]  $\times$  mean serum insulin of 44 pmol/l [7.3  $\mu$ U/ml]).

Microalbuminuria was quantified by Micral chemstrip (Boehringer Mannheim, Indianapolis, IN) as 0 or 10 mg/l (normal), 20 mg/l (borderline normal), 50 mg/l, or 100 mg/l (abnormal). Neither urine flow rates nor urine creatinine concentrations were determined.

Participants were considered to have CHD if they met any one of the following four criteria; specifically, a self-report of a physician's diagnosis of myocardial infarction or angina pectoris, a history of CABG, the presence of definite evidence of past myocardial infarction on ECG (possible and probable infarctions were not included), and/or a history of chest pain in the last 6 months with two of the five qualifiers mentioned earlier.

Socioeconomic status was defined by years of education and graduation from high school and current household income (participant and spouse), with poverty level defined as less than \$15,000 per year.

#### Statistical methods

Participants with missing data were excluded only from the comparisons for which the data were missing. Continuous variables were tested for normality of dis-

tribution. A logarithmic transformation was applied to skewed variables to normalize distributions before statistical analyses. To examine the effects of ethnicity and diabetic/nondiabetic status within sexes, a general linear model of two-way analysis of variance (ANOVA) with age as a covariate was used for continuous variables. For discrete variables, a logistic regression model with age as a covariate was fitted. The interaction between the two main effects also was examined using both methods. In addition, ethnic differences were also examined among the nondiabetic participants only. Odds ratios (ORs) and 95% CIs were calculated using the method of Katz. Pearson product-moment correlation estimates were used to assess the relationships between anthropometric variables and to compare FIRI with fasting serum insulin concentrations within ethnic and sex groups. All analyses were done using SAS software (13).

**RESULTS**— Table 1 shows the prevalences of diabetes, impaired glucose tolerance, and normal glucose tolerance in each ethnicity/sex category. For both male and female Hispanic participants, the prevalence of diabetes was significantly higher than for their non-Hispanic white counterparts (OR 2.16; 95% CI 1.41–3.36;  $P < 0.001$  for men and OR 2.43; 95% CI 1.44–4.16;  $P < 0.001$  for women). Men of both ethnic groups had a higher prevalence of diabetes than women of the same ethnicity (OR 1.53; 95% CI 1.10–2.14;  $P < 0.05$ ). A total of 39 out of 94 participants (41.5%) listed in the previously diagnosed, untreated, and newly diagnosed diabetes categories were identified as having diabetes, when fasting serum glucose concentrations alone were used as proposed in the new criteria (12). The remainder were diagnosed with diabetes because their 2-h post-75 g glucola serum glucose concentrations were  $\geq 11.1$  mmol/l. There was little difference between the ethnic groups in the prevalences of participants with impaired glucose tolerances.

Many of the ethnic differences in the various components making up IRS might be explainable by a higher prevalence of diabetes in Hispanics. For this reason, the ethnic differences were compared separately in the diabetic and nondiabetic participants of each ethnic/sex group with significant  $P$  values shown for the ethnic differences observed in the nondiabetic participants (Tables 2 and 3). Table 4 shows the  $P$  values

**Table 2—Anthropometric measures, measures of carbohydrate metabolism, serum lipid concentrations, prevalence of hypertension and microalbuminuria, and of CHD, and socioeconomic status in 465 male participants among the New Mexico Elder Health Survey**

|                                            | Hispanic           |                    | Non-Hispanic white |                      |
|--------------------------------------------|--------------------|--------------------|--------------------|----------------------|
|                                            | With diabetes      | Without diabetes   | With diabetes      | Without diabetes     |
| n                                          | 71                 | 141                | 44                 | 189                  |
| Age (years)                                | 72.9 ± 0.6         | 73.8 ± 0.6         | 74.8 ± 0.8         | 73.9 ± 0.4           |
| BMI (% ≥27 kg/m <sup>2</sup> )             | 27.4 ± 0.5 (51.4)  | 25.6 ± 0.3 (32.4)  | 27.4 ± 0.5 (54.8)  | 25.5 ± 0.3 (26.1)    |
| WHR (% ≥1.0)                               | 1.00 ± 0.01 (47.8) | 1.00 ± 0.01 (43.9) | 1.00 ± 0.01 (48.8) | 0.98 ± 0.01* (40.4)  |
| WTR (% ≥2.2)                               | 2.14 ± 0.02 (30.9) | 2.10 ± 0.01 (25.9) | 2.11 ± 0.03 (35.7) | 2.06 ± 0.01* (15.8)* |
| STSR (% ≥2.2)                              | 1.77 ± 0.07 (19.7) | 1.56 ± 0.04 (11.7) | 1.52 ± 0.06 (10.0) | 1.40 ± 0.03† (4.8)†  |
| Fasting insulin (% ≥90 pmol/l)             | 132 ± 25 (50.7)    | 75 ± 11 (13.5)     | 192 ± 29 (59.5)    | 52 ± 2† (7.9)        |
| 2-h post-glucola insulin (pmol/l)          | 817 ± 113          | 607 ± 41           | 700 ± 125          | 415 ± 28†            |
| FIRI (% ≥2.2)                              | 4.83 ± 0.80 (73.2) | 1.90 ± 0.34 (12.1) | 7.53 ± 1.32 (76.2) | 1.29 ± 0.07* (7.9)†  |
| HbA <sub>1c</sub> (% ≥8%)                  | 9.21 ± 0.34 (60.6) | 5.94 ± 0.07 (0.7)  | 8.59 ± 0.43 (52.4) | 5.92 ± 0.05 (0)      |
| Total cholesterol (% ≥6.2 mmol/l)          | 5.14 ± 0.13 (19.7) | 5.05 ± 0.10 (15.8) | 4.91 ± 0.12 (4.8)  | 5.21 ± 0.08 (15.9)   |
| HDL cholesterol (% <0.9 mmol/l)            | 1.01 ± 0.03 (38.0) | 1.14 ± 0.03 (23.0) | 1.01 ± 0.04 (35.7) | 1.18 ± 0.03 (17.0)   |
| LDL cholesterol (% ≥4.1 mmol/l)            | 3.18 ± 0.11 (18.8) | 3.12 ± 0.08 (14.9) | 3.01 ± 0.11 (4.90) | 3.32 ± 0.07 (17.3)   |
| Triglycerides (% ≥2.3 mmol/l)              | 2.65 ± 0.29 (38.0) | 1.76 ± 0.11 (19.3) | 2.02 ± 0.16 (35.7) | 1.57 ± 0.07 (17.5)   |
| Hypertension (% present)                   | — (45.1)           | — (41.1)           | — (54.6)           | — (36.0)             |
| Microalbuminuria (% present)               | — (50.0)           | — (25.6)           | — (27.9)           | — (20.2)             |
| CHD (% present)                            | — (44.3)           | — (34.1)           | — (43.2)           | — (29.3)             |
| Education (years) (% high school graduate) | 10.2 ± 0.5 (40.9)  | 9.6 ± 0.4 (39.1)   | 13.4 ± 0.4 (79.6)  | 14.4 ± 0.3† (84.1)†  |
| Income (% <\$15,000 per year)              | — (47.8)           | — (47.0)           | — (20.9)           | — (14.7)†            |

Data are means ± SEM (prevalence rates, % abnormal or present). \*P < 0.05; †P < 0.01, statistically significant difference between nondiabetic Hispanic and non-Hispanic white participants.

for the two main effects of ethnicity and diabetes status, using a general linear model of two-way ANOVA with age as a covariate for continuous variables. A logistic regression

model with age as a covariate was used for discrete variables. The interaction between ethnicity and diabetes status also was examined in both models. The absence of inter-

action (nonsignificant P values), for example, means that the difference between diabetic and nondiabetic participants is the same regardless of ethnicity and vice versa.

**Table 3—Anthropometric measures, measures of carbohydrate metabolism, serum lipid concentrations, prevalence of hypertension and microalbuminuria, and of CHD, and socioeconomic status in 418 female participants among the New Mexico Elder Health Survey**

|                                            | Hispanic           |                    | Non-Hispanic       |                      |
|--------------------------------------------|--------------------|--------------------|--------------------|----------------------|
|                                            | With diabetes      | Without diabetes   | With diabetes      | Without diabetes     |
| n                                          | 47                 | 137                | 26                 | 184                  |
| Age (years)                                | 72.9 ± 0.9         | 74.0 ± 0.5         | 73.0 ± 1.2         | 74.2 ± 0.5           |
| BMI (% ≥27 kg/m <sup>2</sup> )             | 28.3 ± 0.8 (59.1)  | 26.2 ± 0.4 (40.9)  | 28.3 ± 1.0 (62.5)  | 25.6 ± 0.3 (31.1)    |
| WHR (% ≥1.0)                               | 0.91 ± 0.01 (54.4) | 0.87 ± 0.01 (36.8) | 0.91 ± 0.01 (48.0) | 0.85 ± 0.01† (26.4)* |
| WTR (% ≥2.2)                               | 2.01 ± 0.03 (34.1) | 1.89 ± 0.02 (18.9) | 1.95 ± 0.04 (32.0) | 1.78 ± 0.01† (4.6)†  |
| STSR (% ≥2.2)                              | 1.10 ± 0.04 (27.9) | 1.00 ± 0.03 (27.1) | 1.09 ± 0.07 (43.5) | 0.86 ± 0.02† (9.8)†  |
| Fasting insulin (% ≥90 pmol/l)             | 112 ± 17 (40.9)    | 61 ± 4 (17.5)      | 127 ± 20 (56.0)    | 50 ± 3* (8.2)*       |
| 2-h post-glucola insulin (pmol/l)          | 884 ± 144          | 629 ± 50           | 1091 ± 218         | 484 ± 29*            |
| FIRI (% ≥2.2)                              | 3.46 ± 0.65 (45.5) | 1.44 ± 0.11 (16.8) | 4.12 ± 0.65 (64.0) | 1.16 ± 0.08* (8.2)*  |
| HbA <sub>1c</sub> (% ≥8%)                  | 8.40 ± 0.43 (36.4) | 6.10 ± 0.07 (2.2)  | 8.07 ± 0.31 (56.0) | 5.83 ± 0.05† (0.6)   |
| Total cholesterol (% ≥6.2 mmol/l)          | 5.58 ± 0.16 (23.3) | 5.53 ± 0.09 (23.4) | 5.85 ± 0.21 (28.0) | 5.81 ± 0.08* (29.4)  |
| HDL cholesterol (% <0.9 mmol/l)            | 1.22 ± 0.05 (11.4) | 1.34 ± 0.03 (6.6)  | 1.23 ± 0.07 (20.0) | 1.45 ± 0.03* (5.0)   |
| LDL cholesterol (% ≥4.1 mmol/l)            | 3.33 ± 0.14 (17.5) | 3.41 ± 0.08 (22.5) | 3.49 ± 0.20 (27.3) | 3.58 ± 0.07 (27.2)   |
| Triglycerides (% ≥2.3 mmol/l)              | 2.35 ± 0.26 (34.9) | 1.72 ± 0.07 (19.7) | 2.42 ± 0.29 (40.0) | 1.70 ± 0.07 (19.6)   |
| Hypertension (% present)                   | — (59.6)           | — (29.2)           | — (73.1)           | — (36.4)             |
| Microalbuminuria (% present)               | — (39.5)           | — (14.4)           | — (30.4)           | — (10.7)             |
| CHD (% present)                            | — (23.9)           | — (15.7)           | — (40.0)           | — (19.7)             |
| Education (years) (% high school graduate) | 8.3 ± 0.6 (29.8)   | 9.2 ± 0.3 (33.6)   | 13.0 ± 0.5 (88.5)  | 13.8 ± 0.2† (89.5)†  |
| Income (% <\$15,000 per year)              | — (80.0)           | — (70.6)           | — (31.8)           | — (29.2)†            |

Data are means ± SEM (prevalence rates, % abnormal or present). \*P < 0.05; †P < 0.01, statistically significant difference between nondiabetic Hispanic and non-Hispanic white participants.

**Table 4—P values for the main effects from two-way ANOVA for the continuous variables and from logistic regression analysis for the discrete variables, both with age as the covariate, for men and women in the New Mexico Elderly Health Survey**

|                                       | Men              |                 |               | Women            |                 |              |
|---------------------------------------|------------------|-----------------|---------------|------------------|-----------------|--------------|
|                                       | Ethnicity effect | Diabetes effect | Interaction   | Ethnicity effect | Diabetes effect | Interaction  |
| Age                                   | 0.13             | 0.96            | 0.20          | 0.82             | 0.17            | 0.98         |
| BMI (% $\geq 27$ kg/m <sup>2</sup> )  | 0.75 (0.28)      | <0.001 (<0.001) | 0.66 (0.26)   | 0.57 (0.08)      | <0.001 (<0.001) | 0.72 (0.36)  |
| WHR (M% $\geq 1.0$ : F% $\geq 0.9$ )  | 0.18 (0.55)      | 0.09 (0.29)     | 0.56 (0.64)   | 0.25 (0.05)      | <0.001 (0.02)   | 0.22 (0.66)  |
| WTR (M% $\geq 2.2$ : F% $\geq 2.1$ )  | 0.02 (0.03)      | 0.01 (0.005)    | 0.90 (0.12)   | 0.001 (<0.001)   | <0.001 (<0.001) | 0.28 (0.03)  |
| STSR (M% $\geq 2.2$ : F% $\geq 1.2$ ) | 0.001 (0.05)     | 0.002 (0.12)    | 0.91 (0.64)   | 0.06 (<0.001)    | <0.001 (<0.001) | 0.24 (0.002) |
| Fasting insulin (% $\geq 90$ )        | 0.31 (0.11)      | <0.001 (<0.001) | <0.001 (0.06) | 0.92 (0.02)      | <0.001 (<0.001) | 0.05 (0.02)  |
| 2-h post-glucola insulin (pmol/l)     | 0.04             | 0.001           | 0.33          | 0.97             | <0.001          | 0.17         |
| FIRI (% $\geq 2.2$ )                  | 0.34 (0.22)      | <0.001 (<0.001) | 0.003 (0.26)  | 0.89 (0.02)      | <0.001 (<0.001) | 0.11 (0.01)  |
| HbA <sub>1c</sub> (% $\geq 8\%$ )     | 0.09 (*)         | <0.001 (*)      | 0.09 (*)      | 0.23 (0.23)      | <0.001 (<0.001) | 0.46 (0.08)  |
| Total cholesterol (% $\geq 6.2$ )     | 0.94 (0.96)      | 0.38 (0.08)     | 0.14 (0.06)   | 0.06 (0.23)      | 0.84 (0.85)     | 0.98 (0.91)  |
| HDL cholesterol (% <0.9)              | 0.58 (0.18)      | 0.15 (0.009)    | 0.83 (0.60)   | 0.04 (0.56)      | 0.17 (0.02)     | 0.92 (0.26)  |
| LDL cholesterol (% $\geq 4.1$ )       | 0.36 (0.56)      | 0.28 (0.06)     | 0.87 (0.05)   | 0.34 (0.29)      | 0.35 (0.98)     | 0.87 (0.68)  |
| Triglycerides (% $\geq 2.3$ )         | 0.02 (0.70)      | 0.96 (0.008)    | 0.59 (0.88)   | 0.31 (0.98)      | 0.84 (0.04)     | 0.79 (0.74)  |
| Hypertension (% present)              | — (0.33)         | — (0.03)        | — (0.21)      | — (0.18)         | — (<0.001)      | — (0.63)     |
| Microalbuminuria (% present)          | — (0.25)         | — (0.34)        | — (0.11)      | — (0.29)         | — (0.07)        | — (0.94)     |
| CHD (% present)                       | — (0.35)         | — (0.08)        | — (0.71)      | — (0.37)         | — (0.01)        | — (0.42)     |
| Education (% high school graduate)    | <0.001 (<0.001)  | 0.66 (0.56)     | 0.10 (0.61)   | <0.001 (<0.001)  | 0.02 (0.74)     | 0.89 (0.94)  |
| Income (% <\$15,000 per year)         | — (<0.001)       | — (0.37)        | — (0.56)      | — (<0.001)       | — (0.56)        | — (0.59)     |

Data are P values for means (P values for prevalence rates of % abnormal or present). \*Logistic regression results are not valid because of the sample size.

An example of a significant difference in interaction between Hispanic and non-Hispanic white men is shown when one examines the fasting insulin levels, where mean values for Hispanic diabetic and nondiabetic participants were 132 and 75 pmol/l, respectively, compared with differences of a much greater magnitude between non-Hispanic white diabetic and nondiabetic participants of 192 and 52 pmol/l, respectively ( $P < 0.001$ ). A similar difference in interaction was observed in women ( $P = 0.05$ ). More complete information on the separate components of the anthropometric and other measurements, along with a further breakdown into participants with diabetes and those with impaired versus normal glucose tolerance, has been archived at the National Technical Information Service, U.S. Department of Commerce (Springfield, VA) under Standard Technical Report Number (STRN) UNM/EHS-98/1 (New Mexico Elder Health Survey).

When anthropometric measures of all Hispanic participants were compared with all non-Hispanic white participants (men and women), Hispanics were shorter and weighed less than non-Hispanic whites ( $P < 0.001$ ). The Hispanics, however, had higher BMI, but this was significant ( $P < 0.05$ ) only in that more Hispanic women than non-Hispanic white women had BMI  $\geq 27$  kg/m<sup>2</sup>. Both male and female Hispan-

ics had waist circumferences similar to their non-Hispanic white counterparts (slightly lower in Hispanic men, higher in Hispanic women), but they had lower mean hip ( $P < 0.05$  for men) and thigh ( $P < 0.05$  for men;  $P < 0.001$  for women) circumferences. The mean WHR ( $P < 0.05$  in men;  $P < 0.01$  in women) and WTR ( $P < 0.01$  in men;  $P < 0.001$  in women) therefore were significantly higher in both Hispanic men and women than in non-Hispanic whites. Similarly, the mean subscapular skinfold thicknesses were higher ( $P < 0.05$  in women) and triceps skinfold thicknesses were lower ( $P < 0.01$  in men) so that STSR was higher ( $P < 0.001$ ) in both Hispanic men and women.

Diabetic participants from all four ethnic groups had higher measures of both total and central obesity compared with nondiabetic participants (Tables 2 and 3). Significant ethnic differences also were seen when just nondiabetic male and female participants were compared. The ethnic differences in BMI and WHR largely disappeared when adjustments for age and diabetes status were made, but the differences persisted for WTR and STSR with Hispanics having higher ratios than non-Hispanic whites (Table 4). The ethnic differences in measures of central obesity were greater in women than in men. The Pearson correlation coefficients comparing total body obese-

ness (BMI) with measures of central or upper body obesity (WHR, WTR, STSR) were low, ranging from 0.184–0.440 in men to 0.182–0.294 in women. Similarly, comparisons between WHR and WTR compared with STSR were low in both men and women.

When comparing ethnic differences by sex for all participants, fasting and 2-h post-glucola insulin concentrations, FIRI, 2-h glucose concentrations, and HbA<sub>1c</sub> levels were significantly higher in Hispanics than in their non-Hispanic white counterparts; fasting serum glucose concentrations were not. When ethnic comparisons by sex were made for nondiabetic participants only, the 2-h serum glucose concentrations and HbA<sub>1c</sub> levels no longer were significantly different, but the other differences persisted. Interestingly, when the ethnic differences for all (diabetic and nondiabetic) participants were compared in Table 4, the ethnic differences generally failed to reach levels of statistical significance because the differences in fasting and 2-h insulin concentrations and FIRI between Hispanic diabetic and nondiabetic participants were not nearly as great as those observed in non-Hispanic whites. This is apparent in comparing the interaction between ethnicity and diabetes effects as described earlier.

Pearson correlation coefficients between FIRI and fasting serum insulin concentra-



tions were high, ranging from 0.941 to 0.982 within the four ethnic/sex groups. This means that most of the variance in serum fasting glucose and insulin concentrations could be explained by the latter so that little advantage was gained by calculation of FIRI as opposed to using the fasting serum insulin concentrations.

As one would anticipate, after division of participants by diabetic status and by ethnic/sex groups, obese participants (BMI  $\geq 27$  kg/m<sup>2</sup>) in each group had higher fasting and 2-h insulin concentrations and FIRI than nonobese participants. When one compares the prevalences of elevated fasting insulin concentrations ( $\geq 90$  pmol/l) and FIRI ( $\geq 2.2$ ) for all obese compared with nonobese participants who were adjusted for age, ethnicity, and sex, the odds ratios (OR 4.60; 95% CI 3.15–6.79;  $P < 0.001$  for the fasting insulin concentration and OR 4.90; 95% CI 3.41–7.11;  $P < 0.001$  for the FIRI) indicate that these measures of insulin resistance are more often increased in obese compared with nonobese subjects. Using the General Linear Models (GLM) procedure and adjusting the fasting serum insulin concentrations for age and BMI as continuous variables, the nondiabetic Hispanics still had higher fasting insulin concentrations than non-Hispanic whites ( $P < 0.05$  for both men and women).

When serum lipid concentrations were compared for all participants in the four ethnic/sex groups, Hispanics of both sexes tended to have higher serum triglyceride concentrations and lower HDL cholesterol concentrations than non-Hispanic whites. As shown in Tables 2 and 3, these differences largely could be attributed to the higher prevalence of diabetes in Hispanics because these are changes characteristic of diabetes. In the analysis in Table 4, after adjustment for the diabetes effect, the only significant effects that remained were that Hispanic men had higher serum triglyceride concentrations, and Hispanic women had lower HDL concentrations than non-Hispanic whites. The lower total cholesterol concentrations in Hispanic women were of borderline significance ( $P = 0.06$ ). When ethnic differences were compared in nondiabetic participants, the only significant findings were that Hispanic women had lower serum total and HDL cholesterol concentrations compared with non-Hispanic whites.

The prevalence of hypertension was comparable in the two ethnicities. Slightly more non-Hispanic whites were on antihypertensive medications, but Hispanics

tended to have higher mean systolic pressures. No differences in diastolic pressures were observed. When participants with diabetes were compared with those without diabetes by ethnicity and sex, women of both ethnicities with diabetes had more hypertension ( $P < 0.01$ ). This difference was not as apparent in men, being significant only in non-Hispanic white men ( $P < 0.05$ ).

The frequency of microalbuminuria was increased in both Hispanic men and women compared with non-Hispanic white men and women ( $P < 0.05$ ). The differences appear to be explained again by the higher prevalence of diabetes in Hispanics. Diabetic Hispanics of both sexes more frequently had microalbuminuria than their non-Hispanic white counterparts; however, these ethnic differences in frequency of microalbuminuria were not seen in participants without diabetes.

Hispanic men had a slightly higher prevalence for CHD compared with non-Hispanic white men; Hispanic women had a slightly lower prevalence. Diabetes tended to be less of a risk factor for CHD in Hispanics, especially women. Diabetes was a significant risk factor for CHD only in non-Hispanic white women ( $P < 0.01$ ).

Finally, there were striking differences in demographic and socioeconomic status between Hispanics and non-Hispanic whites in urban New Mexico. While over 90% of our Hispanic participants were born in New Mexico, over 90% of our non-Hispanic white participants migrated to New Mexico. There was a very low rate of intermarriage between the two ethnic groups. The education levels, both as mean years of education and as percentage of participants completing high school, and current household incomes, shown as percentage with incomes below the poverty level of \$15,000, indicate that the Hispanics are disadvantaged economically compared with non-Hispanic whites ( $P < 0.001$ ).

**CONCLUSIONS** — Our population of the urban elderly is similar in heritage to the younger, rural population surveyed in the San Luis Valley Diabetes Study from southern Colorado (15,16). Those Hispanic participants were 3.5 times more likely to have diabetes than were non-Hispanic whites. Risk factors included age, male sex, greater obesity, more upper body fat patterning, a positive family history, lower income, and less education. When adjusted for the above-mentioned risk fac-

tors, there was still a significant 1.9-fold excess risk for diabetes in Hispanics compared with non-Hispanic whites in the San Luis Valley. This prevalence and pattern of risk factors is consistent with our observations in this older, urban population.

Even more intensively studied are the Mexican-American Hispanics, mostly those living in Texas, who are reported to represent 62% of the Hispanics in the U.S. (17). Stern, Haffner, and coinvestigators (4–6, 18–31) have characterized an “obesity- or insulin resistance-related” pattern of cardiovascular risk factors that is prevalent in Mexican-Americans, despite a lower prevalence of CHD than in non-Hispanic whites (7–9). This refers not only to the increased prevalence of type 2 diabetes, but also to the increased prevalence of adiposity, a more centralized or upper body distribution of body fat, hyperinsulinemia, insulin resistance, dyslipidemia (hypertriglyceridemia and low HDL cholesterol concentrations), hypertension, and microalbuminuria, a pattern repeated in New Mexico Hispanics.

The defects in carbohydrate metabolism responsible for this increased prevalence of type 2 diabetes in Hispanics remain incompletely defined. Haffner et al. (6), examining the relative importance of insulin resistance and abnormal insulin secretion as risk factors for diabetes in Mexican-Americans, found that early abnormalities in both independently predicted the subsequent development of diabetes when nondiabetic Mexican-Americans were restudied 7 years later. An observation that proved puzzling in our study, similarly reported in younger Mexican-Americans from the San Antonio Heart Study (31), is that the prevalence of participants with impaired glucose tolerance was not increased in Hispanics compared with non-Hispanic whites. One possible explanation is that most of the participants destined to develop diabetes had gone through the stage of impaired glucose tolerance and now had diagnosed diabetes. Another possibility is that there might be a basic difference in carbohydrate metabolism, e.g., that fasting (overnight) hepatic gluconeogenesis is increased in Hispanics leading to fasting hyperglycemia and an earlier diagnosis of diabetes.

Most epidemiological studies have used fasting insulin levels as a surrogate measure of insulin sensitivity or resistance. This is more feasible than the euglycemic-hyperinsulinemic clamp technique (32), which is accepted as the gold standard for measurement of insulin sensitivity. Laakso (33) and

Anderson et al. (34) both showed better correlations between a single fasting insulin concentration and the clamp technique for individuals with normal glucose tolerance ( $r = 0.66$  and  $0.53$ , respectively) than for individuals with impaired glucose tolerance ( $r = 0.47$  and  $0.25$ , respectively). Therefore, it would seem that any adequate measure of insulin resistance should involve both glucose and insulin components (35). Duncan et al. (13) proposed a simple measure of insulin resistance and entitled it the fasting insulin resistance index (FIRI), which is a product of the serum glucose and insulin divided by a constant that would make this index equal to one for individuals with normal glucose and insulin levels. This is similar in principle to the homeostasis model assessment (HOMA-IR) proposed by Matthews et al. (36), which showed a correlation between the HOMA-IR and the euglycemic clamp measurements of  $r = 0.88$ . Cleland et al. (37) subsequently reported a good correlation between the FIRI and the euglycemic clamp values ( $r = 0.67$  in 31 nondiabetic subjects and  $r = 0.74$  in NIDDM patients). Nevertheless, such a high correlation existed between fasting serum insulin concentrations and FIRI so that most of the variances could be explained by the fasting insulin rather than glucose concentrations, and little appears to be gained by using the FIRI as opposed to the fasting insulins. Haffner et al. (31) similarly reported the correlation coefficient between fasting insulin and HOMA-IR was 0.976 for their population.

Total body obesity and body fat distribution are both independent risk factors for diabetes and CHD (38). In the San Antonio Heart Study (39), BMI was an independent risk factor for diabetes, but ceased to be so when the WHR was added to the predicting model. Centralized obesity rather than generalized obesity also was a stronger risk factor for insulin resistance (29,40), CHD (18,39), hypertension (27), and dyslipidemia (18,25,40,41). Haffner et al. (18), using the San Antonio Heart Study database, concluded that the WHR had a stronger ability to predict the presence of diabetes and lipid abnormalities than STSR. They also showed, as we did, that WHR and STSR were relatively independent of each other, especially in men, suggesting that they reflect different aspects of regional body fat distribution. The STSR measures upper body subcutaneous fat, whereas the WHR assesses both visceral and subcutaneous fat. The hypothesis is that visceral

adiposity results in an increased flow of free fatty acids to the liver via the portal vein resulting in an impairment of hepatic insulin clearance (42).

Diabetes, hyperinsulinemia, and insulin resistance all are associated with an atherogenic serum lipid profile, specifically, high serum triglyceride and low HDL cholesterol concentrations (43). This has been attributed to the effect on liver lipid metabolism of the increased flow of free fatty acids from visceral adipose tissue in those with centralized obesity. The increased prevalence of this dyslipidemic pattern in our elderly Hispanic population appears to be only partially explained by a higher prevalence of diabetes, hyperinsulinemia, and insulin resistance. Systolic and diastolic hypertension also are commonly associated with type 2 diabetes and insulin resistance, and epidemiological studies indicate that this association is independent of total or central obesity (43). Again, our studies support this finding, especially in women. There is a well-recognized increased risk for CHD in patients with diabetes. Even in subjects with hyperinsulinemia and normal glucose tolerance, there is an increased risk for CHD (44–46). As in the San Luis Valley Study (10), however, the link between diabetes and CHD appeared to be stronger in non-Hispanic whites than in Hispanics.

Previous studies on the prevalences of diabetes and the IRS and their impacts on the prevalence of CHD in southwestern Hispanics have targeted younger populations in Texas and rural southern Colorado. This survey is the first to report an elderly (age  $\geq 65$  years) cohort, recognizing that they represent the survivors, matched against a comparable, randomly selected cohort of non-Hispanic whites from the same urban area. This study begins to fill important gaps in information about one of the major health concerns of a population that is the most rapidly growing ethnic minority.

**Acknowledgments**— This work was supported by grants from the National Institute on Aging (RO1AG10941) and UNM GCRC (National Center for Research Resources GCRC grant MO1RR00997).

#### References

1. Carter JS, Pugh JA, Monterrosa A: Non-insulin-dependent diabetes mellitus in minorities in the United States. *Ann Int Med* 125:221–232, 1996
2. Flegal KM, Ezzati TM, Harris MI, Haynes

SG, Juarez RZ, Knowler WC, Perez-Stable J, Stern MP: Prevalence of diabetes in Mexican-Americans, Cubans, and Puerto Ricans from the Hispanic Health and Nutrition Examination Survey, 1982–1984. *Diabetes Care* 14:628–638, 1991

3. Reaven GM: Banting Lecture 1988: role of insulin resistance in human disease. *Diabetes* 37:1595–1607, 1988
4. Haffner SM, Stern MP, Hazuda HP, Pugh JA, Patterson JK: Hyperinsulinemia in a population at high risk for non-insulin-dependent diabetes mellitus. *N Engl J Med* 315:220–224, 1986
5. Haffner SM, Miettinen H, Stern MP: Insulin secretion and resistance in nondiabetic Mexican Americans and non-Hispanic whites with a parental history of diabetes. *J Clin Endocrinol Metab* 81:1846–1851, 1996
6. Haffner SM, Miettinen H, Gaskill SP, Stern MP: Decreased insulin secretion and increased insulin resistance are independently related to the 7 year risk of NIDDM in Mexican Americans. *Diabetes* 44:1386–1391, 1995
7. Stern MP, Bradshaw BS, Eifler CW, Fong DS, Hazuda HP, Rosenthal M: Secular decline in death rates due to ischemic heart disease in Mexican Americans and non-Hispanic whites in Texas, 1970–1980. *Circulation* 76:1245–1250, 1987
8. Mitchell BD, Hazuda HP, Haffner SM, Patterson JK, Stern MP: Myocardial infarction in Mexican Americans and non-Hispanic whites: the San Antonio Heart Study. *Circulation* 93:45–51, 1991
9. Mitchell BD, Stern MP, Haffner SM, Hazuda HP, Patterson JK: Risk factors for cardiovascular mortality in Mexican Americans and non-Hispanic whites. *Am J Epidemiol* 131:423–433, 1990
10. Rewers M, Stretterly SM, Baxter J, Marshall JA, Hamman RF: Prevalence of coronary heart disease in subjects with normal and impaired glucose tolerance and non-insulin-dependent diabetes mellitus in a biethnic Colorado population. *Am J Epidemiol* 135:1321–1330, 1992
11. Baumgartner RN, Koehler K, Romero L, Garry PH, Lindeman RD: Muscle mass and obesity are jointly associated with disability, impaired balance and gait, and fall in elderly men and women. *Am J Epidemiol* 147:755–763, 1998
12. The Expert Committee on the Diagnosis and Classification of Diabetes Mellitus: Report of the Expert Committee on the Diagnosis and Classification of Diabetes Mellitus. *Diabetes Care* 20:1183–1197, 1997
13. Duncan MH, Singh BM, Wise PH, Carter G, Alagband-Zadeh J: A simple measure of insulin resistance. *Lancet* 346:120–121, 1995
14. SAS User's Guide: Basics, Version 6.10 Edition. Cary, NC, SAS Institute
15. Marshall JA, Hamman RF, Baxter J, Mayer

- EJ, Fulton DL, Orleans M, Rewers M, Jones RH: Ethnic differences in risk factors associated with the prevalence of non-insulin-dependent diabetes mellitus. *Am J Epidemiol* 137:706–718, 1993
16. Hamman RF, Marshall JA, Baxter J, Kahn LB, Mayer EJ, Orleans M, Murphy JR, Lezotte DC: Methods and prevalence of non-insulin dependent diabetes mellitus in a biethnic population: the San Luis Valley Diabetes Study. *Am J Epidemiol* 129:295–311, 1989
  17. Hais CL, Hewett-Emmett D, Bertin TK, Schul WJ: Origins of U.S. Hispanics: implications for database. *Diabetes Care* 14 (Suppl. 3):618–627, 1991
  18. Haffner SM, Stern MP, Hazuda HP, Pugh J, Patterson JK: Do upper body and centralized adiposity measure different aspects of regional body-fat distribution? Relationship to NIDDM, lipids and lipoproteins. *Diabetes* 36:43–51, 1987
  19. Haffner SM, Stern MP, Hazuda HP, Rosenthal M, Knapp JA, Malina RM: Role of obesity and fat distribution in non-insulin-dependent diabetes mellitus in Mexican Americans and non-Hispanic whites. *Diabetes Care* 9:153–161, 1986
  20. Haffner SM, Hazuda HP, Mitchell BD, Patterson JK, Stern MP: Increased incidence of type 2 diabetes mellitus in Mexican Americans. *Diabetes Care* 102–108, 1991
  21. Haffner SM, Stern MP, Dunn JF, Mobley M, Blackwell J, Bergman RN: Diminished insulin sensitivity and increased insulin response in non-obese, non-diabetic Mexican Americans. *Metabolism* 39:842–847, 1990
  22. Stern MP, Haffner SM: Body fat distribution and hyperinsulinemia as risk factors for diabetes and cardiovascular disease. *Arteriosclerosis* 6:123–130, 1986
  23. Haffner SM, Fong D, Hazuda HP, Pugh JA, Patterson JK: Hyperinsulinemia, upper body adiposity, and cardiovascular risk factors in nondiabetics. *Metabolism* 37:338–345, 1988
  24. Haffner SM, Mitchell BD, Hazuda HP, Stern MP: Greater influence of central distribution of adipose tissue on incidence of non-insulin-dependent diabetes in women than men. *Am J Clin Nutr* 53:1312–1317, 1991
  25. Haffner SM, Stern MP, Hazuda HP, Rosenthal M, Knapp JA: The role of behavioral variables and fat patterning in explaining ethnic differences in serum lipids and lipoproteins. *Am J Epidemiol* 123:830–839, 1986
  26. Haffner SM, Stern MP, Mitchell BD, Hazuda HP, Patterson JK: Incidence of type II diabetes in Mexican Americans predicted by fasting insulin and glucose levels, obesity and body-fat distribution. *Diabetes* 39:283–288, 1990
  27. Haffner SM, Mitchell BD, Stern MP, Hazuda HP, Patterson JK: Decreased prevalence of hypertension in Mexican Americans. *Hypertension* 16:225–232, 1990
  28. Espino DV, Maldonado D: Hypertension and acculturation in elderly Mexican Americans: results from 1982–84 Hispanic HANES. *J Gerontol* 45:M209–M213, 1990
  29. Haffner SM, Mitchell BD, Valdez RA, Hazuda HP, Morales PA, Stern MP: Eight year incidence of hypertension in Mexican Americans and non-Hispanic whites: the San Antonio Heart Study. *Am J Hypertension* 5:147–153, 1992
  30. Haffner SM, Stern MP, Gruber MKK, Hazuda HP, Mitchell BD, Patterson JK: Microalbuminuria: potential marker for increased cardiovascular risk factors in non-diabetic subjects. *Arteriosclerosis* 10:727–731, 1990
  31. Haffner SM, Miettinen H, Stern MP: The homeostasis model in the San Antonio Heart Study. *Diabetes Care* 20:1087–1092, 1997
  32. DeFronzo RA, Tobin JD, Andres R: Glucose clamp technique: a method for quantifying insulin secretion and resistance. *Am J Physiol* 237:E214–E223, 1973
  33. Laakso M: How good a marker is insulin level in insulin resistance? *Am J Epidemiol* 137:959–965, 1993
  34. Anderson RL, Hamman RF, Savage PJ, Saad MF, Laws A, Kades WW, Sands RE, Cefalu W: Exploration of simple insulin sensitivity measures derived from frequently sampled intravenous glucose tolerance tests: the Insulin Resistance Arteriosclerosis Study. *Am J Epidemiol* 142:724–732, 1995
  35. Boyko EJ, Leonetti DL, Bergstrom RW, Fujimoto WY: Fasting insulin level underestimates risk of non-insulin dependent diabetes mellitus due to confounding by insulin secretion. *Am J Epidemiol* 145:18–23, 1997
  36. Matthews DR, Hosker JP, Rudenski AS, Naylor BA, Treacher DF, Turner RC: Homeostasis model assessment: insulin resistance and beta cell function from fasting plasma glucose and insulin concentrations in man. *Diabetologia* 28:412–419, 1984
  37. Cleland SJ, Petrie JR, Morris AD, Ueda S, Dorrian CA, McConnell HJ: FIRI: a fair insulin resistance index? (Letter) *Lancet* 347:770, 1996
  38. Stern M, Haffner S: Body fat distribution and hyperinsulinemia as risk factors for diabetes and cardiovascular disease. *Arteriosclerosis* 6:123–130, 1986
  39. Stern MP: Do non-insulin-dependent diabetes mellitus and cardiovascular disease share common antecedents? *Ann Intern Med* 124:110–116, 1996
  40. Anderson AJ, Sobocinski KA, Freedman DS, Barboriak JJ, Rim AA, Gruchow HW: Body fat distribution, plasma lipids, and lipoproteins. *Arteriosclerosis* 8:88–94, 1988
  41. Carey DG, Jenkins AB, Campbell LV, Freund J, Chisholm DJ: Abdominal fat and insulin resistance in normal and overweight women: direct measurements reveal a strong relationship in subjects at both low and high risk of NIDDM. *Diabetes* 45:633–638, 1996
  42. Bolinder J, Kager L, Ostman J, Arner P: Difference in the receptor and post-receptor levels between human omental and subcutaneous adipose tissue in the action of insulin on lipolysis. *Diabetes* 32:117–123, 1983
  43. DeFronzo RA, Ferrannini E: Insulin resistance: a multifaceted syndrome responsible for NIDDM, obesity, hypertension, dyslipidemia, and atherosclerotic cardiovascular disease. *Diabetes Care* 14:173–194, 1991
  44. Zavaroni I, Bonora E, Pagliari M, Dall'Aglio E, Luchetti L, Buonanno G, Bonati PA, Bergonzani M, Gnudi L, Passer M, Reaven G: Risk factors for coronary artery disease in healthy persons with hyperinsulinemia and normal glucose tolerance. *N Engl J Med* 320:702–706, 1989
  45. Depres J-P, Lamarche B, Mauriege P, Cantin B, Bagenais GR, Moorjani S, Lupien PJ: Hyperinsulinemia as an independent risk factor for ischemic heart disease. *N Engl J Med* 334:952–957, 1996
  46. Ferrannini E, Haffner SM, Mitchell DB, Stern MP: Hyperinsulinaemia: the key feature of a cardiovascular and metabolic syndrome. *Diabetologia* 34:416–422, 1991
